# Supplementary material for: Seismic imaging in the eastern Scandinavian Caledonides: siting the 2.5 km deep COSC-2 borehole, central Sweden
Source: Copernicus journal article supplement (doi:10.5194/se-2015-129), 2016-01-15

# 1 Seismic imaging in the eastern Scandinavian Caledonides: 2 Siting the 2.5 km deep COSC-2 borehole, central Sweden.

3 C. Juhlin, P. Hedin, D. G. Gee, H. Lorenz, T. Kalscheuer and P. Yan

4 Department of Earth Sciences, Uppsala University, Uppsala, Sweden

5 Correspondence to: P. Hedin (peter.hedin@geo.uu.se)

## 6 Abstract

7 The Collisional Orogeny in the Scandinavian Caledonides (COSC) project, a contribution  
8 to the International Continental Scientific Drilling Program (ICDP), aims to provide a deeper  
9 understanding of mountain belt dynamics. Scientific investigations include a range of topics,  
10 from subduction-related tectonics to the present-day hydrological cycle. COSC investigations  
11 and drilling activities are focused in central Scandinavia where rocks from the mid to lower  
12 crust of the orogen are exposed near the Swedish-Norwegian border. Here, rock units of  
13 particular interest occur in the Seve Nappe Complex (SNC) of the so-called Middle  
14 Allochthon and include granulite facies migmatites (locally with evidence of ultra-high  
15 pressures) and amphibolite facies gneisses and mafic rocks. This complex overlies  
16 greenschist facies metasedimentary rocks of the dolerite-intruded Särvi Nappes and  
17 underlying, lower grade Jämtlandian Nappes (Lower Allochthon). Reflection seismic profiles  
18 have been an important component in the activities to image the sub-surface structure in the  
19 area. Sub-horizontal reflections in the upper 1-2 km are underlain and interlayered with  
20 strong west- to northwest-dipping reflections, suggesting significant east-vergent thrusting.  
21 Two 2.5 km deep fully cored boreholes are a major component of the project which will  
22 improve our understanding of the sub-surface structure and tectonic history of the area.  
23 Borehole COSC-1 (IGSN: <http://hdl.handle.net/10273/ICDP5054EEW1001>), drilled in  
24 the summer of 2014, targeted the subduction-related Seve Nappe Complex and the contact  
25 with the underlying allochthon. The COSC-2 borehole will be located further east and  
26 investigate the lower grade, mainly Cambro-Silurian rocks of the Lower Allochthon, the  
27 [Jämtlandian](#) décollement and penetrate into the crystalline basement rocks to identify the  
28 source of some of the northwest-dipping reflections. A series of high resolution seismic  
29 profiles have been acquired along a composite c. 55 km long profile to help locate the COSC  
30 drill holes. We present here the results from this COSC-related composite seismic profile  
31 (CSP), including new interpretations based on previously unpublished data acquired between  
32 2011 and 2014. These seismic data, along with shallow drill holes in the Caledonian thrust  
33 front and previously acquired seismic, magnetotelluric, and magnetic data, are used to  
34 identify two potential drill sites for the COSC-2 borehole.

**Borttaget:** main Jämtlandian

## 36 1 Introduction

37 Following the Ordovician closure of the Iapetus Ocean, major Caledonian orogeny  
38 involved continent collision and underthrusting of Baltica beneath Laurentia. Subduction-  
39 related metamorphism along the Baltica margin was taking place already in the early to  
40 middle Ordovician (Gee et al., 2012; Majka et al., 2012) and the initial stages of continent-  
41 continent collision are believed to have occurred around 445 Ma (e.g. Ladenberger et al.,  
42 2012, 2014). Thrust tectonics, which dominated throughout the collision, resulted in the  
43 emplacement of allochthonous units both westwards onto the Laurentian platform of  
44 Greenland (Higgins and Leslie, 2000) with displacements of [the higher allochthons](#) at least  
45 200 km, and eastwards onto the Baltoscandian platform with displacements of more than  
46 [500 km](#) (Gee, 1978).

47 Towards the end of Caledonian Orogeny, in the early Devonian, the mountain belt was in  
48 many aspects comparable to the presently active Himalaya-Tibet Orogen (Dewey 1969; Gee  
49 et al., 2010; Labrousse et al., 2010). Following post-orogenic collapse, extension and [deep](#)  
50 erosion, the surface of the present day Caledonides cuts through the internal architecture of  
51 the paleo-orogen, revealing the nappe structure at mid-crustal depths. The Scandinavian  
52 mountains, the Scandes, have long been recognized as an excellent environment to study  
53 thrust tectonics (Törnebohm, 1888) and the processes involved in continent-continent  
54 collision (Gee, 1975; Hossack and Cooper, 1986).

55 Investigations of the Scandinavian Caledonides ([Fig. 1](#)) were intensified in the 1970's  
56 (Gee and Sturt, 1985) and our understanding has since then improved through continued  
57 geological (e.g. the many contributions in Corfu et al., 2014) and numerous geophysical (e.g.  
58 Dyrelius, 1980, 1986; Elming, 1988; Hurich et al., 1989; Palm et al., 1991; Hurich, 1996;  
59 Juhojuntti et al., 2001; Pascal et al., 2007; Korja et al., 2008; England and Ebbing, 2012)  
60 studies. One key area of investigation (Dyrelius et al., 1980) has been along a profile  
61 crossing the mountain belt through the provinces of Jämtland (Sweden) and Trøndelag  
62 (Norway). Reflection seismic surveys were conducted along the Central Caledonian Transect  
63 (CCT) which stretches from east of the Caledonian thrust front in central Jämtland to the  
64 Atlantic coast in western Trøndelag (Hurich et al., 1989; Palm et al., 1991; Hurich, 1996;  
65 Juhojuntti et al., 2001). The highly reflective upper crust shows a reflectivity pattern of crustal  
66 shortening consistent with surface observations, i.e. imbrication of allochthonous units and  
67 folding by major N-S to NE-SW-trending antiforms and synforms.

68 At the thrust front in central Sweden, Cambrian alum shales, deposited unconformably on  
69 the autochthonous crystalline basement, are separated from the overlying Caledonian  
70 allochthons by a major décollement (Gee et al., 1978). Comprehensive drilling programs

Borttaget: 400

Borttaget: several hundred million years of

73 targeting the metalliferous organic-rich alum shales (Gee et al., 1982) in the thrust front south  
74 of lake Storsjön reached about 30 km to the northwest, establishing a 1-2° westwards dip of  
75 the décollement. At the Caledonian front in central Jämtland, this major detachment  
76 coincides with the Caledonian sole thrust (see profile in Fig. 1). We define the main  
77 décollement (in Jämtland – the Jämtlandian décollement, at the base of the Jämtlandian  
78 Nappes) as the thrust zone that separates all the overlying long-transported allochthons from  
79 the underlying less deformed basement. The sole thrust corresponds to the lower limit of  
80 Caledonian deformation, i.e. involving both the long-transported allochthons and the  
81 underlying crystalline basement in and below the antiformal windows. Along the CCT  
82 reflection seismic profile, the sole thrust in the western part (Palm et al., 1991) was inferred  
83 to ramp up eastwards and pass into the Jämtlandian décollement, as defined in areas north  
84 of Storsjön (Juhojuntti et al., 2001). The sole thrust defined by Palm et al (1991) beneath the  
85 Åre Synform and Mullfjället Antiform was inferred to continue westwards to the Swedish-  
86 Norwegian border, where it appears to reach a depth of c. 7 km (Hurich et al., 1989);  
87 perhaps deeper (Gee, 1988, Hurich 1996), beneath the imbricated crystalline basement of  
88 the Skardöra Antiform. This interpretation is in agreement with previous modeling of  
89 refraction seismic (Palm, 1984), aeromagnetic (Dyrelius, 1980) and gravity data (Dyrelius,  
90 1985; Elming, 1988). Magnetotelluric measurements along the Swedish section of the CCT  
91 profile (Korja et al., 2008), targeting the highly conductive alum shales, further support this  
92 interpretation.

93 A transition from thin-skinned (where deformation is mostly restricted to the allochthonous  
94 sediment-dominated units) to thick-skinned tectonics (with deep crustal deformation and  
95 basement shortening) is often attributed to large scale detachments and fault systems in the  
96 hinterland (Hurich, 1996; Mosar, 2003; Fossen et al., 2014) that are reactivated during post-  
97 collisional extension. In the case of the Caledonides, these are late-orogenic and involve NE-  
98 SW extension along the axis of the orogen. However, the previous thrusting may well have  
99 been influenced by the pre-Caledonian geometry of the rifted and extended Neoproterozoic  
100 margin of Baltica (Gee et al., 2012).

101 Juhojuntti et al. (2001) identified a present day Moho at a depth of c. 45-50 km beneath  
102 central Sweden and suggested deep crustal deformation in the subducting Baltica plate.  
103 However, the source of the strong reflections observed from within the Paleoproterozoic  
104 basement beneath Jämtland remains to be determined. Two potential sources of the  
105 reflectivity patterns have been proposed (Palm et al., 1991, Juhojuntti et al., 2001), one being  
106 that they are related to the deformation history and the other that they are lithological in  
107 origin. Deformation zones could have developed during the Caledonian or Precambrian  
108 (Sveconorwegian, c. 1.0 Ga, or older) orogenies. Alternatively, most of the reflections could  
109 represent deformed mafic intrusions in the dominantly granitic basement rocks. Dolerite sills

**Borttaget:** thrust

**Borttaget:** , referred to here as the Jämtlandian décollement,

**Borttaget:** the sole thrust to correspond to the lower limit of Caledonian deformation whereas the main décollement

**Borttaget:** corresponds to the

**Borttaget:** To the north of Storsjön, the inferred continuation westwards of this main décollement was traced along

**Borttaget:** 6

**Borttaget:** ,

**Borttaget:** is yet

120 in the Siljan Ring area, a hundred kilometers to the southeast, are known to generate a  
121 similar seismic response (Juhlin, 1990). Dolerite sills and dykes are found to the south  
122 (0.95 Ga, Juhlin, 1990; Högdahl et al., 2004) and east (1.25 Ga, Högdahl et al., 2004;  
123 Söderlund et al., 2006) of the thrust front of the central Scandinavian Caledonides and also  
124 in the Olden Window (Sjöström and Talbot, 1987).

125 [The Collisional Orogeny in the Scandinavian Caledonides \(COSC\) project \(Gee et al.,](#)  
126 [2010; Lorenz et al., 2011\) aims to improve our understanding of collisional orogeny through](#)  
127 [scientific deep drilling of selected targets in the Swedish Caledonides. COSC is supported by](#)  
128 [the International Continental Scientific Drilling Program \(ICDP\) and operates within the](#)  
129 [framework of the Swedish Scientific Drilling Program \(SSDP\), which has the objective to](#)  
130 [investigate fundamental questions of global importance that are well defined in Scandinavia](#)  
131 [and require drilling](#)↓

132 The first phase of the project, COSC-1, targeted the lower units of the high grade Svecofennian  
133 Nappe Complex (SNC). These rocks [that](#) originated along the rifted outer margin of continent  
134 Baltica, including the continent-ocean transition (COT) zone (Andreasson, 1994), were  
135 partially subducted during the Ordovician and then emplaced hot onto underlying  
136 allochthons. COSC-1 was drilled to a depth of 2.5 km with almost 100% core recovery during  
137 May to August 2014 (Lorenz et al., 2015). The second phase, COSC-2, involves a second  
138 2.5 km deep borehole that will start in the Lower Allochthon and aims to penetrate the  
139 Jämtlandian décollement as well as at least one of the underlying enigmatic basement  
140 reflectors. The focus of COSC-2 lies in understanding the thin-skinned thrusting over [this](#)  
141 [detachment horizon](#), the character of the deformation in the underlying crystalline  
142 Fennoscandian basement, and how this foreland deformation relates to the partial  
143 subduction of the Baltica margin in the hinterland (e.g. the Western Gneiss Region of  
144 southwestern Norway) in the early Devonian (Robinson et al., 2014).

145 In 2010, a 36 km long high resolution reflection seismic profile was acquired in the Åre  
146 area (Fig. 1) with the purpose of finding the most suitable locations for the two scientific  
147 boreholes (Hedin et al., 2012). The location of the COSC-1 borehole was defined from these  
148 data (together with logistical considerations), but a location fulfilling the requirements of  
149 COSC-2 was not clearly identified. The interpreted [Jämtlandian](#) décollement and basement  
150 reflections appeared to continue shallowing towards the east and the main seismic profile  
151 was therefore extended by about 17 km in 2011 and another c. 14 km in 2014. A substantial  
152 gap in the 2011 acquisition was bridged in 2014 by an additional c. 16 km long highly  
153 crooked profile south of the 2011 profile (Fig. 2).

154 Complementary to the seismic profiling, a magnetotelluric (MT) survey was conducted  
155 along the entire seismic profile in 2013 (Yan et al., 2016). Although this also suffered from  
156 the need for a diversion [and, thus, follows the highly crooked](#) seismic profile, it [provides](#) clear

**Borttaget:** The Swedish Scientific Drilling Program (SSDP) is operating within the framework of the International Continental Scientific Drilling Program (ICDP) to investigate fundamental questions of global importance that are well defined in Scandinavia and require drilling. One of the major projects led by SSDP is the Collisional Orogeny in the Scandinavian Caledonides (COSC) project (Gee et al., 2010; Lorenz et al., 2011). This project aims to improve our understanding of collisional orogeny through scientific deep drilling of selected targets in the Swedish Caledonides.

**Borttaget:**

**Borttaget:** the

**Borttaget:** main décollement

**Borttaget:** main

**Borttaget:** , as with the

**Borttaget:** provided

173 constraints on the depth to the top of the highly conductive alum shales. In addition, new  
174 aeromagnetic data were acquired by the Swedish Geological Survey in 2011, showing  
175 prominent features that may be linked with Rätan-type magnetite-rich granites in the  
176 basement.

177 This paper focuses on the interpretation of the recently acquired seismic profiles, together  
178 referred to as the COSC seismic profiles (CSP), and the linking of these with the results from  
179 the drilling program in the late 1970's and observations from the COSC-1 borehole. In the  
180 light of the new geophysical data (reflection seismic, MT and aeromagnetic), we present an  
181 updated and extended interpretation of the seismic section from Hedin et al. (2012), along  
182 with alternative interpretations of the [Jämtlandian décollement](#) and [the sole thrust](#). Based on  
183 our interpretations of the CSP data and the goals of the COSC scientific deep drilling project,  
184 we propose two candidate locations for the second borehole, COSC-2.

## 185 2 Caledonian geology and the central Jämtland profile

186 As mentioned above, the Caledonian allochthons in the thrust front of the orogen are  
187 separated from the underlying Precambrian crystalline basement by [the major Jämtlandian](#)  
188 [décollement](#). Along most of the orogenic front in Scandinavia and in the basement windows  
189 further west, this décollement is associated with Cambrian black alum shales (Andersson et  
190 al 1985) which were deposited unconformably on the basement, prior to thrust emplacement  
191 of the overlying nappes. These kerogen-rich shales, with carbon contents up to 15%, acted  
192 as a lubricant to facilitate the low angle thrusting of the nappes for hundreds of kilometers  
193 onto the continental margin and platform of Baltica.

194 The Scandian nappes are commonly grouped into four major assemblages – Lower,  
195 Middle, Upper and Uppermost, as originally proposed for the Swedish Caledonides by  
196 Kulling (in Strand and Kulling, 1972), depending upon their level in the thrust system (Gee et  
197 al., 1985). Baltoscandian platform, inner margin and foreland basin strata dominate the  
198 Lower Allochthon. The outer margin and COT assemblages are generally thought to  
199 comprise the Middle Allochthon. Iapetus ocean-derived terranes characterize the Upper  
200 Allochthon and, at the top (Uppermost Allochthon), fragments of continental margin affinities  
201 are inferred to have been derived from Laurentia (Fig. 1). All these allochthons, together, are  
202 influenced by late orogenic shortening, with the development of major antiforms and  
203 synforms on N-S to NE-SW trending axes. [Many of the antiforms expose](#) basement-cover  
204 relationships. In western Jämtland, the lithologies that comprise the Lower, Middle and Upper  
205 allochthons are well developed and distinct. [The tectonostratigraphic level of the exposed](#)  
206 [rocks increases](#) from east to west.

**Borttaget:** , with

**Borttaget:** main

**Borttaget:** detachments being at both shallower

**Borttaget:** deeper levels than previously inferred

**Borttaget:** a

**Borttaget:** ,

**Borttaget:** many

**Borttaget:** former

**Borttaget:** ingexposing

**Borttaget:** and occur with increasingly higher units present at the surface

218 The Caledonian geology was mapped and compiled at 1:200,000 [scale](#) by Strömberg et  
219 al. (1984), and described by Karis and Strömberg (1998). Their work provides the basis for  
220 the map presented in Fig. 2. The bedrock geology of central and western Jämtland was  
221 summarized in the context of the COSC project by Gee et al. (2010). Therefore, we focus the  
222 geological overview in this paper on an ESE-WNW directed profile that starts in the  
223 crystalline basement just east of Hackås (Fig. 2) and passes through the Jämtlandian  
224 Nappes, via Myrviken, where extensive drilling in the 1970's investigated the alum shales  
225 and the [Jämtlandian](#) décollement, as far west as Marby. A few kilometers farther west, near  
226 Hallen, the new seismic profiles (CSP) start and continue westwards through the  
227 Jämtlandian Nappes to merge into the 2010 profile that crosses the Lower Seve Nappe and  
228 ends at Byxtjärn, just east of Åre (Fig. 2). The westernmost part of this profile, the Byxtjärn-  
229 Liten (BL) reflection seismic profile, was reported on in detail by Hedin et al. (2012).

230 Mapping of the many river sections transecting the Caledonian thrust front in the Scandes  
231 provided early investigators of the mountain belt with clear evidence of a very gently W-  
232 dipping Precambrian basement surface (unconformity), overlain by thin autochthonous  
233 Cambrian sandstones and shales (locally also Neoproterozoic sandstones and tillites, and  
234 Ordovician limestones), beneath the [Jämtlandian](#) décollement. Prospecting for lead and zinc  
235 sulphide mineralizations in the sandstones (e.g. Grip, 1960; Saintilan et al., 2015), for  
236 example in the Laisvall and Vassbo areas (Fig. 1), provided supporting evidence for these  
237 observations. Subsequent, wide-ranging drilling programs by the Geological Survey of  
238 Sweden, targeting trace element concentrations in the metalliferous Cambrian Alum Shale  
239 Formation (Gee et al., 1982) and, more locally, in directly overlying limestones (Gee et al.,  
240 1978) defined the thrust front geometry to extend regularly westwards in the order of 30-  
241 40 km towards the hinterland, dipping at an angle of 1-2° to the west-northwest.

### 242 **2.1 From the Caledonian front to Marby**

243 In the Myrviken area in central Jämtland (Fig. 2), south of Storsjön, the drilling program  
244 (Gee et al., 1982) defined the geometry of an exceptionally thick (up to 180 m) alum shale  
245 unit directly overlying the Caledonian sole thrust (here corresponding to the Jämtlandian  
246 décollement). Twenty-eight drill holes (all cored) provided the basis for identifying a major  
247 low grade uranium, vanadium, molybdenum, [and nickel](#) resource in the organic-rich alum  
248 shales. Most of the holes also penetrated a thin sandstone-dominated autochthonous  
249 Cambrian sedimentary succession overlying late Paleoproterozoic granites of the crystalline  
250 basement. Within the allochthonous units, both quartzites, stratigraphically underlying the  
251 alum shales, and limestones overlying them, occur in an imbricate stack that comprises the  
252 so-called Jämtlandian Nappes of the Lower Allochthon.

Borttaget: main

Borttaget: main

255 The above-mentioned drill holes allow the décollement surface to be mapped in the  
256 Myrviken area (Fig. 2) and it shows the typical character of the Caledonian thrust front  
257 throughout most of the mountain belt. Interestingly, the fold axes in the allochthon in this area  
258 trend approximately N-S instead of NE-SW, possibly due to an anomalous basement high,  
259 c. 50 km to the northeast in the Lockne area (Fig. 2), the result of a mid Ordovician meteorite  
260 impact (Lindström et al., 1996). Cross-sections through the area of southern Storsjön  
261 illustrate the structure of the imbricate stack (Andersson et al., 1985). Figure 3 shows a  
262 25 km long profile trending NW, and partly NNW, from the thrust front near Hackås to Marby  
263 (Gee et al., 1982), oriented approximately parallel to the dip of the Jämtlandian décollement.  
264 This drill hole-based profile ends about 10 km east of the eastern termination of the  
265 Dammån-Hallen (DH) seismic profile. If account is taken of the klippe (tectonic outlier)  
266 occurring to the south-southeast of Hackås in the Bingsta area, the Jämtlandian décollement  
267 can be inferred to provide a regular surface, dipping about 1 degree west-northwest, over a  
268 distance of c. 40 km.

Borttaget:

Borttaget: (Andersson et al., 1985)

Borttaget: main

Borttaget: and sole thrust of the Jämtlandian Nappes

Borttaget: most easternmost end

Borttaget: main

## 269 2.2 From Hallen to Liten

270 The exposed and near surface bedrock between the village of Hallen and lake Liten is  
271 dominated by Ordovician turbidites of the Jämtlandian Nappes. Only in the area of  
272 southeastern Liten are younger strata (lower Silurian, including quartzites, limestones, black  
273 shales and, perhaps, turbidites) preserved locally in a shallow NW-trending syncline.  
274 Together with thick underlying Ordovician turbidites, this Jämtlandian sedimentary  
275 succession is folded regionally, on approximately N-trending axes and apparently imbricated  
276 by thrusting that is best exposed to the south of the CSP in the N-plunging Oviksfjällen  
277 Antiform. The latter is inferred to be a southern continuation of the Olden Antiform and, as  
278 shown on the Strömberg et al. (1984) map, comprises thrust sheets dominated by early  
279 Cambrian (perhaps late Ediacaran) quartzites, minor alum shales and subordinate slices of  
280 basement-derived felsic volcanic rocks, similar to the porphyritic rhyolites outcropping in the  
281 Mullfjället Antiform, to the west of the Åre Synform.

Borttaget: and

Borttaget: The turbidites are

## 282 2.3 From Liten to Byxtjärn

283 Between Liten and Byxtjärn, near Undersåker, the seismic profile crosses the thrust  
284 between the Lower and Middle allochthons. The former is composed of low to sub-  
285 greenschist facies Ordovician turbidites, locally passing up into early Silurian strata. In the  
286 hanging wall, the Seve Nappe Complex of the Middle Allochthon dips gently westwards in  
287 the eastern limb of the Åre Synform. It comprises mainly quartzites and subordinate  
288 calcisilicate-rich psammitic gneisses and marbles, with abundant amphibolitized dolerites and  
289 gabbros and some, usually isolated, ultramafites. These rocks comprise a highly reflective

Borttaget: Allochthons

299 assemblage as found in the seismic investigations over the Åre and Tännfors synforms  
300 (Palm et al., 1991) and in the more recent seismic data presented in Hedin et al. (2012).  
301 Along the thrust contact between the Seve Nappe Complex and the underlying strongly  
302 folded and intensely foliated turbidites of the Lower Allochthon there occurs a sheet of felsic  
303 gneisses, locally underlain by a few tens of meters of ductilely deformed Särvi Nappe  
304 metasediments and concordant greenstones. Based on the seismic data acquired [over the](#)  
305 [Åre Synform](#) to date (Palm et al., 1991; Hedin et al., 2012, 2016), prominent reflective units  
306 that do not [crop out](#) in the eastern limb of the [synform](#) are expected to be present at depth  
307 [further west, beneath its central and western parts. Results from the 2.5 km deep COSC-1](#)  
308 [borehole show that the reflectivity of the Seve Nappe Complex is due to the contrast](#)  
309 [between the high metamorphic grade gneisses and amphibolites \(Hedin et al., 2016\). Some](#)  
310 [of the reflections originating from below the bottom of the borehole, interpreted not to be part](#)  
311 [of the Seve Nappe Complex, can be traced towards the east, but do not extend to the](#)  
312 [surface.](#)

313 [In](#) the western limb of the Åre Synform and the axial zone of the Mullfjället Antiform, Tiren  
314 (1981) mapped a detachment close above the basement and described relationships similar  
315 to those in the Caledonian front, i.e. with most of the quartzites, alum shales and overlying  
316 turbidites being allochthonous in relation to the underlying Precambrian acid volcanic rocks  
317 with their thin [unconformable](#) veneer of alum shales and limestones.

### 318 3 Acquisition of the COSC seismic profiles (CSP)

319 Seismic acquisition parameters for the reflection seismic profiles from 2011 and 2014  
320 were similar to those of the Byxtjärn-Liten (BL) and Kallsjön-Fröå (KF) segments, presented  
321 by Hedin et al. (2012) and summarized in Table 1. Crooked line acquisition was necessary  
322 along all the profiles due to the need to follow existing roads and paths. In general, an  
323 asymmetric split-spread geometry was employed that continuously moved with respect to the  
324 source. The acquisition varied slightly from profile to profile (depending on e.g. the terrain,  
325 road permissions, etc.). In addition, for the data acquired in 2014, changes were made to the  
326 source and recording equipment. The [CSP](#) segments that [are](#) presented in this paper, are  
327 summarized below.

#### 328 3.1 Byxtjärn-Liten (BL, 2010)

329 More than 1800 source points were activated along a 36 km long profile (Fig. 2) using a  
330 rock-breaking hydraulic hammer (VIBSIST) mounted on a front end loader. Nominal source  
331 and receiver spacing was 20 m and a split spread of 360 active channels using 28 Hz  
332 geophones was rolled along with the source. In two locations of greater interest, the source  
333 point spacing was decreased to 10 m to increase the local fold. No source points were

Borttaget: Juhojuntti et al., 2001;

Borttaget: outcrop

Borttaget: Åre S

Borttaget: the

Borttaget: axis

Borttaget: of the synform

Borttaget: Further west, in

Borttaget: make up the composite CSP,

Borttaget: ,



343 activated at the first 124 receiver locations (in the terrain), or along a few short parts in the  
344 western half (no permission to activate the source) resulting in a decreased fold in these  
345 areas. The fold along the entire profile therefore shows significant variation (Hedin et al.,  
346 2012).

Borttaget: )

### 347 3.2 Liten-Dammån (LD, 2011)

348 Acquisition of the Liten-Dammån profile used the same VIBSIST source as for the  
349 Byxtjärn-Liten profile. Permission to activate the source and plant receivers was not obtained  
350 along a nearly 4.5 km stretch of road close to the beginning of this profile, leaving a gap in  
351 the acquisition geometry between the Byxtjärn-Liten and Liten-Dammån profiles (Fig. 2). This  
352 was partially bridged by using wireless receivers on the western side of the gap, coinciding  
353 with the last 1 km of the Byxtjärn-Liten profile, while wired receivers were placed on the  
354 eastern side. Source points were activated on both sides of the gap to undershoot it as much  
355 as possible. However, complete undershooting was not obtained.

Borttaget: . This created

### 356 3.3 Dammån-Hallen (DH, 2014)

357 The main profile of 2014 was the 14 km eastwards extension of the Byxtjärn-Liten and  
358 Liten-Dammån profiles, beginning at Dammån and ending south of Hallen (Fig. 2).  
359 Acquisition parameters for this profile differed from the Byxtjärn-Liten and Liten-Dammån  
360 profiles in that a different source was used, and 28 Hz geophones instead of 10 Hz  
361 geophones. More importantly, the source was less powerful. A 400 kg weight-drop mounted  
362 on a small Bobcat excavator replaced the VIBSIST source. Previous studies (Sopher et al.,  
363 2014; Place et al., 2015) showed that this source could provide enough energy to image the  
364 subsurface to the depths of interest for the project, assuming thin Quaternary cover and  
365 shallow depths to bedrock.

Borttaget: and different geophones were

Borttaget: . Instead of

Borttaget: ,

Borttaget: were used

Borttaget: a lighter

Borttaget: used

Borttaget: .

Borttaget: Instead of the VIBSIST source, a

Borttaget: was used as a

### 366 3.4 Sällsjö (S, 2014)

367 To resolve the structures not imaged properly in the 4.5 km gap of the Liten-Dammån  
368 profile, especially in the uppermost 2 km, a 16 km long profile was designed to fully bridge  
369 this gap. Starting at the same location as the Liten-Dammån profile and overlapping with the  
370 last 1 km of the Byxtjärn-Liten profile, the Sällsjö profile took a more southern route via the  
371 village of Sällsjö before turning north and merging with the Liten-Dammån profile (Fig. 2).  
372 Identical acquisition parameters to the Dammån-Hallen profile were used, that is, the same  
373 source, recording system and spread.

Borttaget: in 2014

Borttaget: used,

## 387 4 Processing

388 Since drilling is targeted to 2.5 km and previous studies have shown source penetration  
389 depth generally to be to 5-6 km, only the first three seconds of data, corresponding to  
390 c. 9 km, were decoded and processed. [For the VIBSIST data of the Byxtjärn-Liten and Liten-](#)  
391 [Dammån profiles, decoding was performed following Park \(1996\) and Cosma and Enescu](#)  
392 (2001). 400-500 hits per source point were stacked together to generate seismograms with a  
393 high S/N ratio. For the data acquired with the weight-drop source along the Sällsjö and  
394 Dammån-Hallen profiles, the normally eight hits per source location were stacked together to  
395 similarly enhance the S/N ratio of the seismograms. The corresponding seismograms were  
396 then used as input to a standard seismic processing package.

397 The vertical component data from the 3-component wireless receivers used in the Liten-  
398 Dammån profile were extracted and merged with the 1-component receivers. Noisy traces  
399 from bad source points (e.g. due to bad weather conditions, bad ground coupling) and  
400 receivers (e.g. due to bad ground coupling, instrument malfunction, environmental noise)  
401 were then removed prior to subsequent processing.

402 A smoothly curved crooked Common Midpoint (CMP) line was defined for the Byxtjärn-  
403 Liten and Dammån-Hallen profiles to minimize the number of missing traces while still  
404 following the acquisition line as closely as possible. Many of the structures in the area are  
405 sub-horizontal with a slight dip in the direction of acquisition. Therefore, it is possible (as  
406 shown below) to stack the midpoint traces of the Sällsjö profile, despite their far offset,  
407 together with those of the Liten-Dammån profile onto a straight CMP line segment between  
408 the Byxtjärn-Liten and Dammån-Hallen profiles and obtain a seismic section with coherent  
409 reflections.

410 In general, the processing followed a standard processing sequence (Table 2). However,  
411 as the VIBSIST and weight-drop data differed to some extent in their character due to the  
412 changed acquisition setups, pre-stack processing was performed separately for the different  
413 profiles. Examples of common source gathers from two locations along the profiles, before  
414 and after pre-stack processing, are shown in Fig. 4.

415 Thorough velocity analyses were performed in conjunction with both NMO and DMO  
416 corrections. DMO improved the coherency of the reflections along the Byxtjärn-Liten and  
417 Liten-Dammån profiles, but did not result in improved coherency along the Sällsjö and  
418 Dammån-Hallen profiles. The crookedness of the Sällsjö profile and the generally lower S/N  
419 ratio along the Dammån-Hallen profile may explain the lack of improvement. Therefore, when  
420 the Liten-Dammån data were jointly processed with the Sällsjö data, as discussed below, no  
421 DMO was applied.

**Borttaget:** Along

**Borttaget:** , where the VIBSIST data were acquired,

424 After processing the profiles separately, the Sällsjö and Liten-Dammån profiles were  
425 merged with the Dammån-Hallen profile to fill in the gap. Given that separate processing of  
426 the Sällsjö profile showed generally sub-horizontal reflections to be present below it, or  
427 reflections with NW dip (Fig. 5), the Sällsjö data and part of the Liten-Dammån data were  
428 projected onto a straight CDP processing line (Fig. 2). Likewise, the southeasterly part of the  
429 Liten-Dammån data were combined with the Dammån-Hallen data and processed along a  
430 straight CDP line (Fig. 2). Inspection of Fig. 5 shows that this methodology is generally  
431 justified even for the highly crooked Sällsjö profile. The general characteristics of the Liten-  
432 Dammån profile (Fig. 5a) are maintained in the merged section (Fig. 5c), while the projection  
433 of the data from the Sällsjö profile (Fig. 5b) fills in the gap due to the acquisition constraints.  
434 Although the details in the merged Liten-Dammån and Sällsjö section may not be accurate,  
435 the general structure in the area is well represented.

436 Once processed, the separate profiles were projected onto a single composite profile for  
437 interpretation and migration (Fig. 6). Since lateral variations in velocity are only minor, post-  
438 stack time migration using a Stolt algorithm (Stolt, 1978) was used. The decision to stack  
439 both the Liten-Dammån and Sällsjö profiles on the same straight CDP line parallel with the  
440 dip direction is also favorable for 2D migration as this ensures that structures are moved to a  
441 more representative subsurface location. The migrated sections were finally time-to-depth  
442 converted to generate seismic sections suitable for geological interpretation. A velocity  
443 function based on the velocity analyses performed was smoothed to reduce the effects of  
444 local lateral variations, despite these being minimal, and used for the depth conversion.  
445 Figure 6b shows the section from Fig. 6a after migration and time-to-depth conversion.

## 446 5 Discussion

447 The interpretation of the Byxtjärn-Liten profile by Hedin et al. (2012) showed that the high  
448 grade Seve Nappe Complex corresponds to a highly reflective unit, with a gently west-  
449 dipping eastern boundary in the vicinity of Undersåker (CDP 1200 in Fig. 6b), confirming  
450 previous evidence from the CCT profiling (Palm et al., 1991) in western Jämtland. Beneath  
451 and to the east of the Seve Nappe Complex, a transparent unit (c. 1 km thick) is probably  
452 dominated by Ordovician turbidites, and underlain stratigraphically by thin limestones and  
453 Cambrian alum shales. More flat-lying reflections are present below these folded low grade  
454 metasediments of the Lower Allochthon. The sole thrust was interpreted to be about 4.5 km  
455 below the exposed Seve Nappe Complex at Byxtjärn and to shallow eastwards to about  
456 2.5 km in the vicinity of Liten, at CDP 3100 (Hedin et al. 2012). However, relationships to the  
457 Jämtlandian décollement were uncertain due to lack of a continuous profile to the Caledonian  
458 front and ambiguities in the interpretation of the older CCT profile, where the uppermost crust

Borttaget: profile to form a

Borttaget:

Borttaget: were found

Borttaget: exposed

Borttaget: main décollement

Borttaget: identification of

Borttaget: main

Borttaget: was

467 is not so well imaged. The new composite profile (CSP) presented here (Fig. 7) provides  
468 additional constraints on the structure, but a unique interpretation is still not possible. Below,  
469 we provide some general remarks on the CSP section and the relevance of other  
470 geophysical data for its interpretation. We then discuss interpretations of the seismic data,  
471 related to both a shallow Jämtlandian décollement, and a deeper sole thrust than the one  
472 presented in Hedin et al. (2012). Finally, we discuss two possible locations for the COSC-2  
473 borehole.

**Borttaget:** involving

**Borttaget:** shallower and deeper main

**Borttaget:** the previous interpretation of

### 474 5.1 General characteristics of the COSC composite seismic profile (CSP)

475 Both the VIBSIST source and weight-drop source generated enough energy to allow the  
476 seismic waves to penetrate to at least 9 km depth (Fig. 5). A direct comparison of the  
477 sources is not possible since the profile locations, acquisition geometries and the ambient  
478 noise conditions were not the same. In general, the VIBSIST source provided higher S/N  
479 data than the weight drop source (compare Fig. 5a to Fig. 5b). However, merging of the two  
480 data sets generates a section which allows a clear correlation between reflections northwest  
481 and southeast of the gap on the Liten-Dammån profile (Fig. 5c). In particular, after merging, it  
482 is clear that the sub-horizontal reflection at 0.7 seconds southeast of the gap (to the right of  
483 CDP 900 in Fig. 5c) is not connected to the two reflections at 0.4 to 0.6 seconds northwest of  
484 the gap (to the left of CDP 350 in Fig. 5c). Furthermore, the two west-dipping reflections at  
485 about 1 and 2 seconds (at CDP 1100, Fig. 5a), respectively, southeast of the gap appear to  
486 be connected to the sub-horizontal reflections at 1.8 and 2.6 seconds northwest of the gap  
487 (Fig. 5a). Note that these reflections are better imaged on the Sällsjö profile with the weight-  
488 drop source than on the Liten-Dammån profile with the VIBSIST source (compare Fig. 5a  
489 with Fig. 5b at CDP 100 to 300).

**Borttaget:** generally

490 The entire composite profile (Fig. 7) shows generally sub-horizontal reflections in the  
491 uppermost 2 km. Below this depth the reflections are mainly northwest dipping, but with  
492 some sub-horizontal reflections. An exception is the patchy highly reflective zone in the  
493 upper 2 km in the CSP interval from CDP 100 to CDP 1200, which characterizes the Seve  
494 Nappe Complex. The west-dipping nature of this boundary is clearly defined from CDP 1100  
495 to CDP 900, but the boundary becomes more diffuse below the central parts of the reflective  
496 zone. The diffuse nature of this boundary at depth was verified by the drilling of the COSC-1  
497 borehole to 2.5 km (Lorenz et al., 2015) and the limited 3D seismic survey that was acquired  
498 after drilling was completed (Hedin et al., 2016). Between CDP 1100 and 4600 along the  
499 CSP, distinct, northwest-dipping reflections are present, some of which can potentially be  
500 traced from 7 km depth to the sub-horizontal reflections between 1 and 2 km depth. These  
501 dipping reflections appear to merge into the overlying shallower sub-horizontal reflections.  
502 Similar dipping reflections were also observed on the CCT profile (Juhojuntti et al., 2001) and

**Borttaget:** generally

**Borttaget:** sole

509 some of them can be correlated to the CSP by their geometrical patterns in spite of the two  
 510 profiles being separated by about 20 km. The source of these dipping reflections has  
 511 previously been discussed (Palm et al., 1991; Juhojuntti et al., 2001; Hedin et al., 2012).  
 512 Deformation zones, dolerite sheets, or a combination of the two were considered likely  
 513 candidates. At the southeastern end of the CSP (CDP 4600 to 5500) the data quality  
 514 deteriorates significantly (Fig. 6) due to the presence of an up to 60 m thick sequence of  
 515 unconsolidated Quaternary sediments, which severely attenuate the signals and make it  
 516 difficult to track the reflections beneath them. However, the shallowest sub-horizontal  
 517 reflection can be traced to about 0.5 km depth at the southeasternmost end of the profile, as  
 518 can the northwest-dipping reflection at about 6 km. The lack of clear reflections in between  
 519 these two is due to poor S/N. This reasoning is verified by a comparison with the CCT profile  
 520 (Fig. 8) on which there are clear northwest-dipping reflections in the equivalent depth interval  
 521 and in the same structural position along the profile. Note that the Dammån-Hallen profile  
 522 was not extended further to the southeast due to permitting issues. Even if it had been  
 523 possible, the thick sequence of unconsolidated sediments, also partly present to the  
 524 southeast, would probably have made it difficult to acquire good data.

525 Two important relationships need to be defined – the depth and character of the  
 526 Jämtlandian décollement, and also the thickness and character of the underlying basement  
 527 that has been influenced by Caledonian deformation. The drilling in the Myrviken area,  
 528 southeast of the CSP, clearly defined the Jämtlandian décollement where Cambro-  
 529 Ordovician sedimentary rocks are thrust over a thin autochthonous sedimentary cover and  
 530 the underlying basement shows no evidence of Caledonian deformation. If the geometry of  
 531 the Jämtlandian décollement in this area (Figs. 2 and 3) is projected into the southeastern  
 532 end of the CSP, it would be expected to be found at a depth of about 500 m, coinciding with  
 533 the sub-horizontal reflection found at this depth on the southeastern end of the composite  
 534 section (Fig. 7). This reflection is not continuous northwestwards to CDP 4800, but rather  
 535 irregular, perhaps due to the variable quality of the data that was acquired over the thick  
 536 Quaternary sediments. However, we interpret the reflection at about 0.7 km depth at  
 537 CDP 4800 along the CSP (Fig. 7) to represent the Jämtlandian décollement that was drilled  
 538 further southeast in the Myrviken area. This reflection can be fairly reliably traced along the  
 539 CSP to CDP 3300. Here, it is unclear if the décollement continues along the uppermost  
 540 reflection at 1.2 km depth to CDP 2900 or along the lower one at 1.7 km depth at CDP 2900.  
 541 Several lines of evidence indicate that the shallower reflection probably represents the  
 542 Jämtlandian décollement. On the CCT profile, to the north, the Jämtlandian décollement was  
 543 interpreted to be at about 1 km depth at an equivalent distance from the Caledonian front.  
 544 Interpretation of the depth to magnetic basement based on the slope of the magnetic  
 545 anomalies (using the standard Peter's method, see e.g. Reynolds, 2011) along the

Borttaget: to

Borttaget: comparing

Borttaget: at at

Borttaget: An

Borttaget: question is which reflection in the composite section represents

Borttaget: main

Borttaget: décollement, that is,

Borttaget: horizon which separates

Borttaget: more mobile overlying allochthons from the less deformed

Borttaget: clearly defined this surface

Borttaget: main (

Borttaget: )

Borttaget: main

Borttaget: . This coincides

Borttaget: probably

Borttaget: main

Borttaget: If so, t

Borttaget: this

Borttaget: the main

Borttaget: main

Borttaget: the

Borttaget: on the magnetic data

570 composite profile (Fig. 7) gives values of about 1.3 km and 1 km at CDPs 3100 and 4100,  
571 respectively. Note that an alternative interpretation for the Jämtlandian décollement is that it  
572 deepens already at CDP 5200 down to 1 km depth. This alternative will be discussed later in  
573 the paper.

574 The new magnetotelluric (MT) survey along the profile (Yan et al., 2016) provides  
575 evidence of a gently undulating surface of the prominent uppermost conductive layer, shown  
576 in Fig. 7, this being located at c. 500 m at the eastern end of the CSP, sinking to 600 m at  
577 CDP 3800, rising to 400 m at CDP 3500, sinking again to 1100 m at CDP 2700 and then  
578 rising again at CDP 1600 to 600 m, before dipping west again beneath the Seve Nappe  
579 Complex, west of Undersåker. This undulation fits well with the inferred location of the axes  
580 of the synforms and antiforms that are located in the vicinity to the north and south of the  
581 CSP line. The highly conductive layer is interpreted to represent the uppermost alum shales.  
582 It is therefore possible that the Jämtlandian décollement could be at a depth of about 1.5 km  
583 at CDP 2900 along the CSP and, if so, that it shallows to less than 1 km further west at  
584 CDP 1500 (Fig. 7) and then deepens at CDP 1300, below the Seve Nappe Complex.

585 All alternative interpretations accept the evidence for shallow décollements and require a  
586 substantially deeper location for the Caledonian sole thrust (e.g. Hedin et al., 2012). In both  
587 the Oviksfjällen and Olden antiforms, located to the south and north of the CSP profile,  
588 respectively, and apparently crossing it at c. CDP 3300-3500, there is evidence of substantial  
589 shortening, with a quartzite-dominated thrust stack in Oviksfjällen and much internal  
590 basement deformation in Olden. The Olden Antiform is of particular interest because it  
591 contains an upper part of allochthonous basement (Gee, 1980; Robinson et al., 2014) thrust  
592 over the Cambro-Silurian sedimentary rocks of the Jämtland Supergroup. The extent to  
593 which sedimentary rocks of the Lower Allochthon might be represented at deeper structural  
594 levels than those exposed in the Olden and Oviksfjällen antiforms is at present, impossible  
595 to say; MT methods have difficulty in detecting any features below a strong conductor like the  
596 alum shales that is so well defined in the overlying décollement levels. Furthermore, the  
597 Oviksfjällen and Olden antiforms do not have a strong magnetic signature. The depth extent  
598 of the basement reflectivity is on the order of 10 km and presumably originates in magnetic  
599 basement, therefore, it is not clear how these antiforms can be linked to the origin of the  
600 basement reflections.

## 601 5.2 Interpretations

602 In the following section we discuss alternative interpretations along the CSP. The first one,  
603 based on Hedin et al. (2012), focuses on the sole thrust and considers even deeper  
604 structural levels for the Caledonian deformation. The second considers the Jämtlandian  
605 décollement in relation to the location of the uppermost alum shales and the underlying flat-

Borttaget: depths

Borttaget: main

Borttaget: main

Borttaget: Alternative

Borttaget: , but

**Borttaget:** In the next section we focus on two alternative interpretations along the CSP. The first one is based on that in Hedin et al. (2012) with a deep main décollement; even deeper sole thrusts are also considered. The second one has a shallower main décollement, more in line with the interpretations presented in Juhojuntti et al. (2001) and Korja et al. (2008).

**Borttaget:** Note that even if the main décollement was interpreted as shallower in these studies the limit of Caledonian deformation was interpreted to be deep with a sole thrust reaching as deep as 15 km.¶

Borttaget: main

623 [lying reflectors in the upper 2 km of the crust, in line with the interpretations presented in](#)  
624 [Juhojuntti et al. \(2001\) and Korja et al. \(2008\). Figure 9 illustrates these interpretations.](#)

625 In Figure 9a we present the section of Hedin et al. (2012) up to CDP 2900 (the  
626 easternmost extent of the Byxtjärn-Liten profile); further east we [define](#) a consistent  
627 prolongation within the CSP. [The sole thrust, in western parts at about 4 km depth, rises](#)  
628 [eastwards](#) to the flat reflectors at about 2 km depth between CDP 3400 and 4200. It then  
629 ramps up to c. 1.5 km and continues at this level to CDP 5100. Here it ramps up again to  
630 c. 500 m and extends eastwards into the frontal décollement in the Myrviken area. The flat  
631 sections between CDP 3400 and 5100 both [underlie](#) hanging-wall west-dipping reflections,  
632 which suggests imbrication. The interpretation in Fig. 9a is based on the geology of the  
633 Oviksfjällen Antiform where the early Cambrian (to Ediacaran) quartzites dominate, but  
634 include some slices of Precambrian volcanic rocks, particularly in the eastern limb of the  
635 structure. [Even](#) deeper Caledonian deformation cannot be excluded. In this case, the sole  
636 thrust would extend from the frontal ramp at CDP 5100-5200 via a flat to CDP 4400, and  
637 from there downwards along prominent west-dipping reflections to a flat at c. 5 km depth  
638 beneath CDP 3000 where it continues westwards along more gently dipping reflections. This  
639 alternative would pass into the flat reflectors beneath the Mullfjället Antiform at c. 7 km depth  
640 (Palm et al., 1991) and then perhaps extend beneath the [Skardöra](#) Antiform at similar (Hurich  
641 et al., 1989) or even greater depths (Gee, 1988). Both these “deep sole thrust”  
642 interpretations require that the shallow Råtan-type basement beneath CDP 3400 and farther  
643 east, as suggested by the magnetic data, is allochthonous on top of a basement with similar  
644 characteristics.

645 [The](#) interpretation presented in Fig. 9b [concentrates on the Jämtlandian décollement](#)  
646 [beneath the Jämtlandian Nappes](#) and [the](#) new geophysical and geological evidence [relevant](#)  
647 [to the uppermost 2 km of the crust](#). The characteristic feature here is the shallow level of the  
648 [décollement to the southeast of CDP 1400 and the significant deepening westwards](#) below  
649 the Åre Synform. The [Jämtlandian](#) décollement is [probably](#) accommodated within, or in close  
650 proximity to the highly organic-rich Cambrian alum shales that constitute a weak horizon at,  
651 [or near](#), the [base](#) of the Early Paleozoic Baltoscandian sedimentary succession. [In some](#)  
652 [areas, up](#) to some tens of meters of [Ediacaran to lower Cambrian quartzites](#), separate the  
653 alum shales from the [underlying](#) basement of the Fennoscandian Shield (Andersson et al.,  
654 1985). This unit may be locally absent because of the original basement topography, or  
655 stripping by the overlying thrust; [alternatively, it may be repeated several times within the](#)  
656 [décollement zone](#).

657 The new magnetotelluric (MT) data indicate the presence of a good conductor at  
658 c. 1000 m at CDP 2200 and just below 500 m at CDP 4100 (Fig. 10). Below these depths,  
659 the reflection pattern in the seismic profile indicates imbricate thrusting above a detachment

**Borttaget:** Figure 9 shows two possible interpretations of the composite profile, CSP.

**Borttaget:** require

**Borttaget:** Figure 9a shows the main décollement, here coinciding with the

**Borttaget:** to continue gently upwards

**Borttaget:** have

**Borttaget:** An even

**Borttaget:** Skardöra

**Borttaget:** An alternative

**Borttaget:** is

**Borttaget:** main

**Borttaget:** includes

**Borttaget:** main

**Borttaget:** , but with a

**Borttaget:** main

**Borttaget:** bottom

**Borttaget:** Up

**Borttaget:** Late Proterozoic Vemdalen quartzite

**Borttaget:** main

680 horizon. The latter is interpreted as the original, stratigraphic position of the alum shales,  
681 which host the Jämtlandian décollement. Within the imbricates, alum shale is brought to a  
682 shallower level as indicated by the MT data. This relationship is similar to that observed close  
683 to the present Caledonian front (Fig. 3; Gee et al., 1982; Andersson et al., 1985), where  
684 successions of alum shales with overlying Lower Ordovician limestones and shales and,  
685 further west, underlying quartzites are stacked to several times the original stratigraphic  
686 thickness.

Borttaget: main

Borttaget: Caledonian

Borttaget: occasionally

Borttaget: Late Proterozoic Vemdalen

### 687 5.3 Relationships between the Jämtlandian décollement and mylonites in the Lower Seve 688 Nappe

689 Close to the northwestern end of the profile, in the Åre Synform, the 2.5 km deep COSC-1  
690 drill hole provides control on the Lower Seve Nappe. At c. 1700 m, the borehole enters a  
691 mylonite zone, representing a major thrust at the base of the Seve Nappe Complex. This  
692 zone extends to the bottom of the borehole, but a transition to rocks of lower metamorphic  
693 grade, possibly from the Särvi or Offerdal nappes, occurs at c. 2350 m (Lorenz et al., 2015).  
694 Local 3D reflection seismics at the drill site (Hedin et al., 2016) and a VSP survey in the drill  
695 hole (Krauß et al., 2015) suggest that the base of the thrust zone is located about 200 m  
696 below the bottom of the drill hole. The Särvi and Offerdal Nappes are not continuous in the  
697 Åre area, but thin and pinch out towards the northeast somewhere below the Åre Synform,  
698 as indicated in Fig. 9b. However, farther east the Särvi Nappe is present in a klippen  
699 (Strömberg et al. 1984). It is also remarkable that, east of the Åre Synform, the fault zone  
700 that separates the Lower Seve Nappe from the Lower Allochthon is very narrow (north of  
701 CDP 1150), i.e. significantly different from the mylonite zone observed in the COSC-1  
702 borehole. The contact observed at the surface is most likely a W-dipping normal fault that  
703 places the Lower Seve Nappe against the Lower Allochthon and, thus, cuts out the  
704 tectonostratigraphy in-between. Similar relationships across faults were reported in the area  
705 west of Mullfjället, in Sweden and Skardöra in Norway (Sjöström et al. 1991, Braathen et al.  
706 2000). Below 2 km depth, the normal fault passes into a highly reflective zone above the  
707 interpreted Jämtlandian décollement, which it either cuts or merges into. The borders of the  
708 mylonite zone below the Åre Synform (dotted white lines in Fig. 9) trace along the reflectivity  
709 pattern eastwards towards location (1) in Fig. 9b, where also they merge into the above-  
710 mentioned NW-dipping highly reflective zone above the Jämtlandian décollement. East of  
711 location (1), a prominent shallow basement reflection can be traced subhorizontally towards  
712 location (2), where it offsets the overlying reflections and continues upwards towards the  
713 southeast (broken line in Fig. 9b). It is interpreted as a thrust fault that at location (2) cuts  
714 upwards through the Jämtlandian décollement into the alum shale and brings basement with  
715 overlying rocks closer to the surface. The position, CDP 3100 and 3500, corresponds well

Borttaget: bottom

Borttaget: total depth

Borttaget: seem to

Borttaget: fault

Borttaget: fault zone

Borttaget: Åre, both

Borttaget: main

Borttaget:

Borttaget: northwest

Borttaget: main

Borttaget: main



731 with the location of the Oviksfjällen Antiform, which about 10 km south of the seismic profile  
732 exposes [Ediacaran-Cambrian quartzites](#) in its core (Fig. 2). The nature of the reflectivity  
733 above this interpreted thrust fault is ambiguous. Possibly, it is similar to the basement  
734 reflections farther down. This would imply that the displacement along this particular reflector  
735 is a couple of kilometers, as indicated in Fig. 9b.

736 For the section of the CSP, we suggest the following geological scenario: The high-grade  
737 metamorphic Lower Seve Nappe has a comparatively long tectonothermal history with  
738 [metamorphism and pegmatite intrusion](#), as early as c. 470 Ma (Li et al. 2014). Its [subsequent](#)  
739 emplacement as part of the Seve Nappe Complex has caused the penetrative ductile  
740 deformation with high internal strain, including gneisses with mylonitic fabric. Thrusting  
741 continuously progressed eastwards [with](#) the whole [nappe stack, including the underlying](#)  
742 [units of the Middle Allochthon and Lower Allochthon](#), translated [farther](#) towards the foreland  
743 on the [Jämtlandian](#) décollement in the alum shales.

744 After metamorphic conditions in the Lower Seve Nappe had decreased considerably, the  
745 c. 1 km thick mylonite zone began to develop by continued or resumed movement along the  
746 Seve-Särvi boundary. The [age](#) of the movement on the [interpreted](#) normal fault that  
747 separates the Lower Seve Nappe from the Lower Allochthon, east of the Åre Synform, is  
748 [probably Early Devonian, as suggested by](#) Gee et al. (1994) [for the Røragen](#) detachment  
749 [where movement was inferred to have occurred](#), while thrusting was still going on [at depth](#)  
750 [beneath the Vigelen Antiform](#). This could explain why both the reflective pattern that in the  
751 COSC-1 drill hole was related to the [Seve](#) mylonite zone and the trace of the normal fault  
752 merge into a highly reflective zone that is directly overlying the [Jämtlandian](#) décollement at  
753 location (1) in Fig. 9b.

754 While nappe emplacement during Caledonian Orogeny progressed towards the foreland,  
755 Baltica was successively underthrusting Laurentia. Thus, it is very likely that also the Baltican  
756 basement experienced an eastwards progressing deformation, most likely above a sole  
757 thrust and possibly reactivating existing structures in the Proterozoic basement. Major  
758 orogen-parallel folding (e. g. Åre Synform [and Mullfjället Antiform](#)) occurred above this sole  
759 thrust. In the CSP, at least some of the deep reflections (around [location 3](#) in Fig. 9b) are  
760 thought to represent this basement deformation.

761 [Additional evidence for some Caledonian deformation is found where reflections present](#)  
762 [below the interpreted Jämtlandian detachment appear to continue through it and offset the](#)  
763 [interpreted alum shales. Perhaps the best example of this is between CDPs 2600 and 2800](#)  
764 [\(Fig. 6\) where the "double reflection" may offset the detachment and appears to have](#)  
765 [disturbed the overlying alum shales.](#)

**Borttaget:** Neoproterozoic bedrock

**Borttaget:** migmatization

**Borttaget:** initial

**Borttaget:** . Finally,

**Borttaget:** with the

**Borttaget:** at the bottom was

**Borttaget:** main Caledonian

**Borttaget:** relative

**Borttaget:** not clear. However,

**Borttaget:** suggested that Early Devonian extension on

**Borttaget:** Røragen

**Borttaget:** happened

**Borttaget:** main

**Borttaget:** , Tännforsen

**Borttaget:** (

**Borttaget:** )

**Borttaget:** The development of the thick mylonite zone might be in part related to the development of the orogen parallel folds. Below the Åre Synform, folding of the main décollement could have translated the foreland directed movement upwards to straighten the deformation zone. At the basement culmination east of the Åre Synform, a similar process seems to have translated the deformation downwards into the basement along the probably pre-existing structure between CDP 1100 and 3100.

791 Scientific drilling at the COSC-2 site to 2.5 km will investigate and test the above scenario  
792 down into the shallow basement. It will sample at least one of the deep reflectors at its  
793 shallowest level and define its nature.

#### 794 5.4 Locating the COSC-2 borehole

795 According to the COSC overall scientific targets, the COSC-2 borehole will investigate the  
796 metamorphic and structural evolution from the Lower Allochthon down into the basement of  
797 the Fennoscandian Shield. Important questions to be answered by the drilling are (i) what is  
798 the nature of the Jämtlandian décollement and where is it located, (ii) is the metamorphic  
799 grade inverted in the middle to low grade greenschist facies sedimentary rocks, (iii) were  
800 they heated from above, (iv) what lithologies and structures generate the reflections in the  
801 Precambrian basement, and (v) what is the timing of deformation at these structural levels?

802 To reach these goals, the borehole should first drill the turbidites and limestones of the  
803 Lower Allochthon, penetrate the uppermost Cambrian alum shales and then continue  
804 downwards in the zone of high reflectivity, probably with repetition of thin Ediacaran to  
805 Ordovician sedimentary cover (quartzites, alum shales and limestones) and then through the  
806 Jämtlandian décollement into the Precambrian crystalline basement, sampling at least a  
807 1 km section of the latter.

808 Two possible locations for the COSC-2 borehole have been identified on the composite  
809 profile (Fig. 10). Option 1 is located along the Byxtjärn-Liten profile at CDP 2200 (Fig. 10a).  
810 Assuming that the Jämtlandian décollement has been correctly identified in Fig. 9b, the  
811 borehole will penetrate four reflectors in the underlying basement between about 1.5 and  
812 2.2 km depth. A drill hole in this location would investigate the imbricate thrusting above the  
813 Jämtlandian décollement, whether the inferred deeper (shallow basement) thrust between  
814 CDP 1100 and 3100 is present, and, if not, what then causes the two shallower basement  
815 reflections. The two deeper basement reflections can be traced down to about 6 km  
816 northwest of the proposed site and appear to offset other reflections on the seismic section  
817 (Fig. 7). These two must surely be located in the Precambrian basement. One possible  
818 disadvantage with the location is that the separation between these four deeper reflections is  
819 small, at least on the present processing, and it may be difficult in the borehole to strictly  
820 identify the source to each of the four reflections. However, a combination of new high  
821 resolution seismic data and borehole seismic data should allow the source of the reflections  
822 to be determined without ambiguity.

823 Option 2 (Fig. 10b) is at a location (CDP 4100) where the sole thrust appears to be  
824 converging upwards towards the Jämtlandian décollement. The drill hole would penetrate the  
825 latter, as defined by a zone of flat-lying reflectivity, between CDPs 3100 to 5200, at about 500  
826 m depth; as in the Myrviken drill holes, it would be overlain by the shallowest alum shales.

**Borttaget:** Previously, these sub-horizontal to gently northwest dipping reflections have been interpreted as mafic sheets (Palm et al. 1991. Juhojuntti et al., 2001) hosted by Precambrian sandstones, volcanic rocks of Mullfjället type (Gee et al., 2010), or other igneous rocks that possibly are related to Trans-Scandinavian Igneous Belt (TIB) granites. This is similar to a setting observed in the autochthon, south of the CSP, where highly magnetic c. 1700 Ma Råtan granites are associated with felsic volcanics and overlain by Precambrian sandstones with mafic volcanics.

**Borttaget:** main

**Borttaget:** these

**Borttaget:** ii

**Borttaget:** also

**Borttaget:** iii) what is the nature of the main décollement and where is it located and (

**Borttaget:** will

**Borttaget:** through

**Borttaget:** (par)autochthonous Neoproterozoic

**Borttaget:** ) and

**Borttaget:** -1.5

**Borttaget:** Here, the two interpretations presented in the previous section differ from one another, with the main décollement being shallower in the new interpretation (Fig. 9b).

**Borttaget:** main

**Borttaget:** autochthonous

**Borttaget:** 4

**Borttaget:** main

**Borttaget:** originate

**Borttaget:** It is important to note that a Precambrian reflector may not be drilled if the Hedin et al. (2012) interpretation is correct since the main décollement will then be below the final depth of the borehole. However, we regard this risk as minor, given the evidence from the new MT data and the constraints from the magnetic data.

**Borttaget:** main

**Borttaget:** both interpretations presented in the previous section are similar, but with

**Borttaget:** large duplex structure below the alum shales

**Borttaget:** . The main décollement would be penetrated

**Borttaget:** 1700 m

**Borttaget:** defined

**Borttaget:** seismic data, while the

**Borttaget:** shale in

871 the top of which occur at 400 m, based on the MT data. The Jämtlandian décollement is  
 872 underlain by a duplex structure, about 1 km thick, characterized by more steeply dipping,  
 873 shorter reflections representing boundaries between Cambrian strata (quartzites and  
 874 perhaps subordinate alum shales) and fragments of allochthonous Precambrian basement.  
 875 The basal thrust of the duplex is a well-defined strong sub-horizontal to gently NW-dipping  
 876 reflection, present across entire Fig. 10b, between 1.3 and 1.9 km depth; this probably  
 877 corresponds to the Caledonian sole thrust. At 2.2 to 2.3 km depth, a basement reflector that  
 878 appears to extend westwards to depths of greater than 7 km would be penetrated by this  
 879 hole. The reflection from this structure is rather weak at the proposed site, but clearly  
 880 present.

## 881 6 Conclusions

882 An integrated interpretation of the geophysical and drill hole data (CSP, CCT, MT data,  
 883 aeromagnetics) provides new constraints on the structure in the central part of the  
 884 Scandinavian Caledonides. The Jämtlandian décollement, as identified in the Myrviken drill  
 885 holes of the Caledonian thrust front, can be confidently traced westwards along the  
 886 easternmost 20 km of the CSP, deepening in this section of the profile from about 0.5 km to  
 887 nearly 1 km. Further west, in our preferred interpretation, the Jämtlandian décollement  
 888 continues to be relatively shallow, just somewhat greater than 1 km deep, even shallowing  
 889 on a structural high, before rapidly deepening just east of the Seve Nappe Complex, in the  
 890 eastern limb of the Åre Synform. The previously acquired CCT profile, together with new MT  
 891 and magnetic data are consistent with this interpretation of the Jämtlandian décollement;  
 892 nevertheless, even somewhat deeper levels are possible.

893 The extent of Caledonian deformation below the Jämtlandian décollement and influencing  
 894 the underlying basement, is less easily defined and the location of the Caledonian sole thrust  
 895 remains enigmatic. It may indeed coincide with the surface defined by Hedin et al. (2012) at  
 896 c. 4.5 km depth beneath Åre, and then shallow eastwards, ramping up to converge with the  
 897 Jämtlandian décollement near the end of the CSP and in the Myrviken area. However,  
 898 deeper levels for the sole thrust beneath the CSP and farther to the west cannot be ruled out.  
 899 The new data show mainly northwest dipping structures below the uppermost 1-2 km. Many  
 900 of these structures have a similar pattern as those on the CCT profile located about 20 km to  
 901 the north, suggesting large lateral continuity of the features out of the plane of the CSP. This  
 902 is verified by the highly crooked Sällsjö profile in which reflections can be traced more than  
 903 5 km to the south of the CSP. A definite interpretation of these NW-dipping reflections is not  
 904 possible without drilling into them. The reflectivity pattern suggests that they are Caledonian,  
 905 or possibly reactivated older structures.

**Borttaget:** imbricate stacks above the main décollement would be

**Borttaget:** about 400 m as defined by

**Borttaget:** main

**Borttaget:** décollement at this location would then correspond to the strong sub-horizontal to gently northwest dipping reflection present across entire Fig. 10b between 1.9 and 1.3 km depth. The

**Borttaget:** above this strong reflection, but below the alum shales would represent

**Borttaget:** A weaker dipping reflector, representing the boundary between Cambrian meta-sedimentary rock and allochthonous basement would be penetrated at about 1.2 km.

**Borttaget:** The new seismic data from the composite profile (CSP), acquired between 2010 and 2013, since 2011 in combination with the previous seismic data from Central Caledonian Transect (2010, the CCT) and profile, MT and magnetic data, and the drill holes in the Myrviken area,

**Borttaget:** provide

**Borttaget:** this

**Borttaget:** main (

**Borttaget:** )

**Borttaget:** traced fairly

**Borttaget:** along

**Borttaget:** main

**Borttaget:** may continue

**Borttaget:** depth, and

**Borttaget:** data

**Borttaget:** appear to be

**Borttaget:** main

**Borttaget:** . If correct, this requires the structural model presented in Hedin et al. (2012) to be revised. However, it is possible to interpret the main décollement to deepen already near the eastern end of the profile. If so, this deepening would be consistent with the Hedin et al. (2012) structural model. An

**Borttaget:** main

**Borttaget:** main

**Borttaget:** level

**Borttaget:** for the main décollement

**Borttaget:** entirely

**Borttaget:** ¶  
Regardless of which interpretation is correct, the

**Borttaget:** northwest

949 Two potential locations for the COSC-2 borehole have been identified along the CSP.  
 950 Drilling at the more westerly site, on the south side of Lake Liten, will penetrate the full  
 951 Silurian to Ediacaran stratigraphy and allow detailed analysis of the structure of the  
 952 Jämtlandian décollement, defined by strong flat-lying reflections. It will also penetrate four  
 953 strong reflections below the interpreted Jämtlandian décollement, allowing identification of  
 954 the composition, structural characteristics and timing of deformation of these features.  
 955 Drilling at the alternative site, about twenty kilometers farther southeast, will provide  
 956 important evidence about the Jämtlandian décollement and possibly also the sole thrust.  
 957 However, it may fail to provide unambiguous evidence about the character of the typical NW-  
 958 dipping reflections in the basement, their reflectivity being somewhat diffuse at this potential  
 959 site. Therefore, we favor the western site for the COSC-2 borehole.

960 **Acknowledgements**

961 The COSC project is a part of the Swedish Scientific Drilling Program (SSDP) which  
 962 operates within the framework of the International Continental Scientific Drilling Program  
 963 (ICDP) and the seismic reflection component of the project was funded by the Swedish  
 964 Research Council (VR, grant 2013-5780). P. Hedin is also partly funded by VR. Hans Palm  
 965 (HasSeis) planned and oversaw the seismic acquisition. GLOBE Claritas™ under license  
 966 from the institute of Geological and Nuclear Sciences Limited, Lower Hutt, New Zealand was  
 967 used to process the seismic data and seismic figures were prepared with GMT from P.  
 968 Wessel and W. H. F. Smith. The applied geophysics group at Uppsala University is thanked  
 969 for valuable discussions and advice throughout this work. We thank reviewers Puy Ayarza  
 970 and Don White for constructive feedback on this manuscript.

971 **References**

972 Andersson, A., Dahlman, B., Gee, D. G. and Snäll, S., 1985. The Scandinavian alum shales.  
 973 Geological Survey of Sweden, Ca 56.

974 Andreasson, P.-G., 1994. The Baltoscandian margin in Neoproterozoic–Early Paleozoic time.  
 975 Some constraints on terrain derivation and accretion in the arctic Scandinavian  
 976 Caledonides. *Tectonophysics* 231 (1-3), 1-32, doi: 10.1016/0040-1951(94)90118-X.

977 Braathen, A., Nordgulen, Ø., Osmundsen, P.-T., Andersen, T. B., Solli, A. and Roberts, D.,  
 978 2000. Devonian, orogen-parallel, opposed extension in the Central Norwegian  
 979 Caledonides. *Geology* 28 (7), 615-618, doi: 10.1130/0091-  
 980 7613(2000)28<615:DOOEIT>2.0.CO;2.

981 Corfu, F., Gasser, D. and Chew, D. M., (Eds.) 2014. *New Perspectives on the Caledonides*  
 982 *of Scandinavia and Related Areas*, Geol. Soc. London, Spec. Publ. 390. ISBN: 978-1-  
 983 86239-377-6.

- Borttaget:** would test which of
- Borttaget:** lake
- Borttaget:** main
- Borttaget:** structural interpretations presented here is correct, the shallow main
- Borttaget:** or a deeper one.
- Borttaget:** would
- Borttaget:** reflectors
- Borttaget:** shallow main
- Borttaget:** kilometres
- Borttaget:** . In the event that the Hedin et al. (2012) interpretation is correct then
- Borttaget:** main
- Borttaget:** would not be reached by the borehole. At the more easterly site
- Borttaget:** main décollement would be penetrated at about 1700 m depth. Here,
- Borttaget:** main décollement is represented by a strong sub-horizontal reflection at about 1.7 km, an excellent drilling target, but its response is of an atypical nature compared to most
- Borttaget:** other reflections. A more
- Borttaget:** northwest
- Borttaget:** reflector is present below, but its
- Borttaget:** is

- 1009 Cosma, C. and Enescu, N., 2001. Characterization of fractured rock in the vicinity of tunnels  
1010 by the swept impact seismic technique. *Int. J. Rock Mech. Min. Sci.* 38 (6), 815-821, doi:  
1011 10.1016/S1365-1609(01)00046-6.
- 1012 Dewey, J., 1969. Evolution of the Appalachian/Caledonian Orogen. *Nature* 222 (5189), 124-  
1013 129. doi: 10.1038/222124a0
- 1014 Dyrelius, D., 1980. Aeromagnetic interpretation in a geotraverse area across the central  
1015 Scandinavian Caledonides. *GFF* 102 (4), 421-438, doi: 10.1080/11035898009454498.
- 1016 Dyrelius, D., 1985. A Geophysical Perspective of the Scandinavian Caledonides, in Gee,  
1017 D.G., Sturt, B.A., (Eds.), *The Caledonide Orogen - Scandinavia and related areas*. John  
1018 Wiley & Sons Ltd., Chichester, Great Britain, ISBN: 0-471-10504-X, pages 185-194.
- 1019 Dyrelius, D., 1986. Gravity and magnetics in the central Scandes. *GFF* 108 (3), 278-280, doi:  
1020 10.1080/11035898609454705.
- 1021 Dyrelius, D., Gee, D. G., Gorbatshev, R., Ramberg, H. and Zachrisson, E., 1980. A profile  
1022 through the central Scandinavian Caledonides. *Tectonophysics* 69, 247-284, doi:  
1023 10.1016/0040-1951(80)90213-9.
- 1024 Elming, S.-Å., 1988. Geological modelling based on gravity data from the central part of the  
1025 Swedish Caledonides. *GFF* 110 (4), 317-327, doi: 10.1080/11035898809452666.
- 1026 England, R. W. and Ebbing, J., 2012. Crustal structure of central Norway and Sweden from  
1027 integrated modelling of teleseismic receiver functions and the gravity anomaly. *Geophys.*  
1028 *J. Int.* 191 (1), 1-11, doi: 10.1111/j.1365-246X.2012.05607.x.
- 1029 Fossen, H., Gabrielsen, R. H., Faleide, J. I. and Hurich, C. A., 2014. Crustal stretching in the  
1030 Scandinavian Caledonides as revealed by deep seismic data, *Geology* 42 (9), 791-794,  
1031 doi: 10.1130/G35842.1.
- 1032 Gee, D. G., 1975. A tectonic model for the central part of the Scandinavian Caledonides. *Am.*  
1033 *J. Sci.* A275, 468-515.
- 1034 Gee, D. G., 1978. Nappe displacement in the Scandinavian Caledonides. *Tectonophysics* 47  
1035 (3-4), 393-419, doi: 10.1016/0040-1951(78)90040-9.
- 1036 Gee, D. G., 1980. Basement-cover relationships in the central Scandinavian Caledonides.  
1037 *GFF* 102 (4), 455-474, doi: 10.1080/11035898009454500
- 1038 Gee, D. G., 1988. Thrust Tectonics in the Scandes – upper crustal extension during  
1039 Scandian compression. *GFF* 110 (4), 390-392, doi: 10.1080/11035898809452682.
- 1040 Gee, D. G. and Sturt, B. A., (Eds.) 1985. *The Caledonide Orogen - Scandinavia and related*  
1041 *areas*. John Wiley & Sons Ltd., Chichester, Great Britain. ISBN: 0-471-10504-X
- 1042 Gee, D. G., Kumpulainen, R. and Thelander, T., 1978. The Tåsjön Décollement, Central  
1043 Swedish Caledonides, Geological Survey of Sweden, C 742.
- 1044 Gee, D. G., Snäll, S. and Stejskal, V., 1982. Alunskiffer projektet – Fjällen. Undersökningar  
1045 mellan Östersund och Svenstavik. Rapport till NSG. BRAP 82502, Geological Survey of  
1046 Sweden, unpublished report, 36 pp

- 1047 Gee, D. G., Kumpulainen, R., Roberts, D., Stephens, M. B., Zachrisson, E. and Thon, A.,  
 1048 1985. Scandinavian Caledonides – Tectonostratigraphic Map, Scale 1:2 000 000,  
 1049 Geological Survey of Sweden, Ba 35.
- 1050 Gee, D. G., Juhlin, C., Pascal, C. and Robinson, P., 2010. Collisional Orogeny in the  
 1051 Scandinavian Caledonides (COSC). *GFF* 132 (1), 29-44, doi:  
 1052 10.1080/11035891003759188.
- 1053 Gee, D. G., Janak, M., Majka, J., Robinson, P. and van Roermund, H., 2012. Subduction  
 1054 along and within the Baltoscandian margin during closing of the Iapetus Ocean and  
 1055 Baltica-Laurentia collision, *Lithosphere* 5 (2), 169-178, doi: 10.1130/L220.1.
- 1056 Grip, E., 1960. The Lead deposits of the eastern borders of the Caledonides in Sweden. 21<sup>st</sup>  
 1057 International Geological Congress, Copenhagen. Reports 16, 149-159.
- 1058 Hedin, P., Juhlin, C. and Gee, D. G., 2012. Seismic imaging of the Scandinavian  
 1059 Caledonides to define ICDP drilling sites. *Tectonophysics* 554-557, 30-41, doi:  
 1060 10.1016/j.tecto.2012.05.026.
- 1061 Hedin, P., Almqvist, B. S. G., Berthet, T., Juhlin, C., Buske, S., Simon, H., Giese, R., Krauß,  
 1062 F., Rosberg, J.-E. and Alm, P.-G., 2016. 3D reflection seismic imaging at the 2.5 km deep  
 1063 COSC-1 scientific borehole, central Scandinavian Caledonides. *Tectonophysics*, [in press](https://doi.org/10.1016/j.tecto.2015.12.013),  
 1064 doi: 10.1016/j.tecto.2015.12.013.
- 1065 Higgins, A. K. and Leslie, A. G., 2000. Restoring thrusting in the East Greenland  
 1066 Caledonides, *Geology* 28 (11), 1019-1022, doi: 10.1130/0091-  
 1067 7613(2000)28<1019:RTITEG>2.0.CO;2.
- 1068 Hossack, J. R. and Cooper, M. A., 1986. Collision tectonics in the Scandinavian  
 1069 Caledonides, in: Coward, M.P., Ries, A.C. (Eds.), *Collision Tectonics*. Geol. Soc. London,  
 1070 Spec. Publ. 19, 285-304, doi: 10.1144/GSL.SP.1986.019.01.16.
- 1071 Hurich, C. A., 1996. Kinematic evolution of the lower plate during intracontinental subduction:  
 1072 An example from the Scandinavian Caledonides. *Tectonics* 15 (6), 1248-1263, doi:  
 1073 10.1029/96TC00828.
- 1074 Hurich, C. A., Palm, H., Dyrelius, D. and Kristoffersen, Y., 1989. Deformation of the Baltic  
 1075 continental crust during Caledonide intracontinental subduction: views from seismic  
 1076 reflection data. *Geology* 17 (5), 423-425, doi: 10.1130/0091-  
 1077 7613(1989)017<0423:DOTBCC>2.3.CO;2.
- 1078 Högdahl, K., Andersson, U. B. and Eklund, O., (Eds.) 2004. *The Trans Scandinavian Igneous  
 1079 Belt (TIB) in Sweden: A review of its character and evolution*. Geological Survey of  
 1080 Finland, Special Paper 37, Espoo, Finland, ISBN: 951-690-889-6.
- 1081 Juhlin, C., 1990. Interpretation of the reflections in the Siljan Ring area based on results from  
 1082 the Gravberg-1 borehole. *Tectonophysics* 173 (1-4), 345-360, doi: 10.1016/0040-  
 1083 1951(90)90229-2.
- 1084 Juhojuntti, N., Juhlin, C. and Dyrelius, D., 2001. Crustal reflectivity underneath the Central  
 1085 Scandinavian Caledonides. *Tectonophysics* 334 (3-4), 191-210, doi: 10.1016/S0040-  
 1086 1951(00)00292-4.

Borttaget: manuscript under review

- 1088 Karis, L. and Strömberg, A. G. B., 1998. Beskrivning till berggrundskartan över Jämtlands  
1089 län. Del 2: Fjälldelen. Geological Survey of Sweden, Ca 53 (2), Uppsala, Sweden.
- 1090 Korja, T., Smirnov, M., Pedersen, L. B. and Gharibi, M., 2008. Structure of the central  
1091 Scandinavian Caledonides and the underlying Precambrian basement, new constraints  
1092 from magnetotellurics. *Geophys. J. Int.* 175 (1), 55-69, doi: 10.1111/j.1365-  
1093 246X.2008.03913.x.
- 1094 Krauß, F., Simon, H., Giese, R., Buske, S., Hedin, P. and Juhlin, C., 2015. Zero-Offset VSP  
1095 in the COSC-1 borehole. *Geophysical Research Abstracts* 17, EGU2015-3255.
- 1096 Labrousse, L., Hetényi, G., Raimbourg, H., Jolivet, L. and Andersen, T. B., 2010. Initiation of  
1097 crustal-scale thrusts triggered by metamorphic reactions at depth: Insights from a  
1098 comparison between the Himalayas and Scandinavian Caledonides. *Tectonics* 29 (5), 1-  
1099 14, doi: 10.1029/2009TC002602.
- 1100 Ladenberger, A., Gee, D. G., Be'eri-Shlevin, Y., Claesson, S. and Majka, J., 2012. The  
1101 Scandian collision revisited - when did the orogeny start? *Geophysical Research*  
1102 *Abstracts* 14, EGU2015-12633.
- 1103 Ladenberger, A., Be'eri-Shlevin, Y., Claesson, S., Gee, D. G., Majka, J. and Romanova, I. V.,  
1104 2014. Tectonometamorphic evolution of the Åreskutan Nappe - Caledonian history  
1105 revealed by SIMS U-Pb zircon geochronology. in: Corfu, F., Gasser, D., Chew, D.M.  
1106 (Eds.), *New Perspectives on the Caledonides and Related Areas*. *Geol. Soc. London,*  
1107 *Spec. Publ.* 390, 337-368, doi: 10.1144/SP390.10.
- 1108 Li, Y., Gee, D. G., Almqvist, B. S. G., Klonowska, I., Lorenz, H., Ladenberger, A., Majka, J.  
1109 and Sjöström, H., 2014. Mid Ordovician Leucogranites in the Lower Seve Nappe of central  
1110 Jämtland, Swedish Caledonides. In: *Abstract Volume Geological Society of Sweden,*  
1111 *Lund,* p. 118.
- 1112 Lindström, M., Sturkell, E., Törnberg, R. and Ormouml, J., 1996. The marine impact crater at  
1113 Lockne, central Sweden. *GFF* 118 (4), 193-206, doi: 10.1080/11035899609546255.
- 1114 Lorenz, H., Gee, D. G. and Juhlin, C., 2011. The Scandinavian Caledonides – Scientific  
1115 Drilling at Mid-Crustal Level in a Palaeozoic Major Collisional Orogen. *Sci. Drill.* 11, 60-63,  
1116 doi: 10.2204/iodp.sd.11.10.2011.
- 1117 Lorenz, H., Rosberg, J.-E., Juhlin, C., Bjelm, L., Almqvist, B. S. G., Berthet, T., Conze, R.,  
1118 Gee, D. G., Klonowska, I., Pascal, C., Pedersen, K., Roberts, N. M. W. and Tsang, C.-F.,  
1119 2015. COSC-1 – drilling of a subduction-related allochthon in the Palaeozoic Caledonide  
1120 orogen of Scandinavia. *Sci. Drill.* 19, 1-11, doi: 10.5194/sd-19-1-2015.
- 1121 Majka, J., Be'eri-Shlevin, Y., Gee, D. G., Ladenberger, A., Claesson, S., Konečný, P. and  
1122 Klonowska, I., 2012. Multiple monazite growth in the Åreskutan migmatite: Evidence for a  
1123 polymetamorphic Late Ordovician to Late Silurian evolution in the Seve Nappe Complex  
1124 of west-central Jämtland, Sweden. *J. Geosci.* 57 (1), 3-23, doi: 10.3190/jgeosci.112.
- 1125 Mosar, J., 2003. Scandinavia's North Atlantic passive margin. *J. Geophys. Res.* 108, 2360,  
1126 doi: 10.1029/2002JB002134.

- 1127 Palm, H., 1984. Time-delay interpretation of seismic refraction data in the Caledonian front,  
 1128 Jämtland, central Scandinavian Caledonides. *GFF* 106 (1), 1-14, doi:  
 1129 10.1080/11035898409454597.
- 1130 Palm, H., Gee, D. G., Dyrelius, D. and Björklund, L., 1991. A reflection seismic image of  
 1131 Caledonian structure in Central Sweden. Geological Survey of Sweden, Ca 75.
- 1132 Park, C. B., 1996. Swept impact seismic technique (SIST). *Geophysics* 61 (6), 1789-1803,  
 1133 doi: 10.1190/1.1444095.
- 1134 Pascal, C., Ebbing, J. and Skilbrei, J. R., 2007. Interplay between the Scandes and the  
 1135 Trans-Scandinavian Igneous Belt: Integrated thermo-rheological and potential field  
 1136 modelling of the Central Scandes profile. *Nor. Geol. Tidsskr.* 87 (1-2), 3-12.
- 1137 Place, J., Malehmir, A., Högdahl, K., Juhlin, C. and Nilsson, K., 2015. Seismic  
 1138 characterization of the Grängesberg iron deposit and its mining-induced structures, central  
 1139 Sweden. *Interpretation* 3 (3), SY41-SY56, doi: 10.1190/INT-2014-0212.1.
- 1140 Reynolds, J. M., 2011. *An Introduction to Applied and Environmental Geophysics*, 2nd ed.,  
 1141 Wiley-Blackwell, Chichester, United Kingdom, ISBN: 978-0-471-48535-3.
- 1142 Robinson, P., Roberts, D., Gee, D. G. and Solli, A., 2014. A major synmetamorphic Early  
 1143 Devonian thrust and extensional fault system in the Mid Norway Caledonides: relevance  
 1144 to exhumation of HP and UHP rocks. in: Corfu, F., Gasser, D., Chew, D.M. (Eds.), *New  
 1145 Perspectives on the Caledonides and Related Areas*. *Geol. Soc. London, Spec. Publ.* 390,  
 1146 241-270, doi: 10.1144/SP390.24.
- 1147 Saintilan, N. J., Stephens, M. B., Lundstam, E. and Fontboté, L., 2015. Control of reactivated  
 1148 basement structures on sandstone-hosted Pb-Zn deposits along the Caledonian front,  
 1149 Sweden: Evidence from airborne magnetic field data, structural analysis and ore grade  
 1150 modeling. *Economic Geology* 110 (1), 91-117, doi: 10.2113/econgeo.110.1.91.
- 1151 Sjöström, H. and Talbot, C., 1987. Caledonian and Post-Caledonian structure of the Olden  
 1152 Window, Scandinavian Caledonides. *GFF* 109 (4), 359-361, doi:  
 1153 10.1080/11035898709453109
- 1154 Sjöström, H., Bergman, S. and Sokoutis, D., 1991. Nappe geometry, basement structure and  
 1155 normal faulting in the central Scandinavian Caledonides; kinematic implications. *GFF*  
 1156 113 (2-3), p. 265-269, doi: 10.1080/11035899109453877.
- 1157 Sopher, D., Juhlin, C., Huang, F., Ivandic, M. and Lueth, S., 2014. Quantitative assessment  
 1158 of seismic source performance: Feasibility of small and affordable seismic sources for  
 1159 long term monitoring at the Ketzin CO<sub>2</sub> storage site, Germany. *Journal of Applied  
 1160 Geophysics* 107, 171-186, doi: 10.1016/j.jappgeo.2014.05.016.
- 1161 Stolt, R. H., 1978. Migration by Fourier transform. *Geophysics* 43 (1), 23-48, doi:  
 1162 10.1190/1.1440826.
- 1163 Strand, T. and Kulling, O., 1972. *Scandinavian Caledonides*. Wiley Interscience, London,  
 1164 New York, 302 pp.
- 1165 Strömberg, A., Karis, L., Zachrisson, E., Sjöstrand, T., Skoglund, R., Lundegårdh, P. H.,  
 1166 Gorbatshev, R. and Kornfält, K.-A., 1984. *Berggrundskarta över Jämtlands län utom*



- 1167 förutvarande Fjällsjö kommun, scale 1:200 000. Geological Survey of Sweden, Ca 53  
1168 Geological Map, Uppsala, Sweden.
- 1169 Söderlund, U., Elming, S.-Å., Ernst, R. E. and Schissel, D., 2006. The Central Scandinavian  
1170 Dolerite Group-Protracted hotspot activity or back-arc magmatism? Constraints from U-Pb  
1171 baddeleyite geochronology and Hf isotopic data. *Precambrian Res.* 150 (3-4), 136-152,  
1172 doi: 10.1016/j.precamres.2006.07.004.
- 1173 Tiren, S. A., 1981. Thrust Nappe Geometry in the northern part of the Mullfjället Antiform,  
1174 Jämtland Caledonides, Sweden. *Terra Cognita* 1 (1), 79.
- 1175 Törnebohm, A. E., 1888. Om fjällproblemet. *GFF* 10 (5), 328-336, doi:  
1176 10.1080/11035898809444211.
- 1177 Yan, P., Juanatey, M. A. G., Kalscheuer, T., Juhlin, C., Hedin, P., Savvaidis, A. and Lorenz,  
1178 H.: A magnetotelluric investigation in the Scandinavian Caledonides in western Jämtland,  
1179 central Sweden, using the COSC-1 borehole log as a priori information, *Geophys. J. Int.*,  
1180 review, 2016
- 1181

1182 **Tables**

Table 1. Acquisition parameters for the Byxtjärn-Liten profile (BL, 2010), Liten-Dammån profile (LD, 2011), Sällsjö profile (S, 2014) and Dammån-Hallen profile (DH, 2014).

| Profile                       | BL (2010)       | LD (2011)        | S (2014)       | DH (2014)      |
|-------------------------------|-----------------|------------------|----------------|----------------|
| Spread Type                   | Split spread    | Split spread     | Split spread   | Split spread   |
| Number of channels            | 300-360         | 330-396          | 280-360        | 300-360        |
| Near offset                   | 0 m             | 0 m              | 0 m            | 0 m            |
| Maximum offset                | 6804 m          | 9502 m           | 4633 m         | 4634 m         |
| Receiver spacing              | 20 m            | 20 m             | 20 m           | 20 m           |
| Receiver type                 | 28 Hz, 1C       | 28 Hz, 1C and 3C | 10 Hz, 1C      | 10 Hz, 1C      |
| Source spacing                | 20 m (10 m)     | 20 m             | 20 m           | 20 m           |
| Source type                   | VIBSIST         | VIBSIST          | Weight drop    | Weight drop    |
| Hit interval for hammer       | 100-400 ms      | 100-400 ms       | -              | -              |
| Sweeps per source point       | 3-4             | 4-5              | -              | -              |
| Weight drops per source point | -               | -                | 8              | 8              |
| Nominal fold                  | 150-180         | 165-200          | 140-180        | 150-180        |
| Recording instrument          | SERCEL 408 XL   | SERCEL 428 XL    | SERCEL 428 XL  | SERCEL 428 XL  |
| Field low cut                 | -               | -                | -              | -              |
| Field high cut                | -               | -                | -              | -              |
| Sample rate                   | 1 ms            | 1 ms             | 1 ms           | 1 ms           |
| Record length                 | 26 s            | 29 s             | 28 s           | 28 s           |
| Profile length                | ~36 km          | ~17 km           | ~16 km         | ~14 km         |
| Source points                 | 1807            | 638              | 767            | 626            |
| Data acquired                 | 30/7-13/8, 2010 | 10-19/10, 2011   | 18-24/10, 2014 | 26-30/10, 2014 |

Table 2. Processing steps and parameters for the Byxtjärn-Liten profile (BL, 2010), Liten-Dammån profile (LD, 2011), Sällsjö profile (S, 2014) and Dammån-Hallen profile (DH, 2014). BL, S+LD and DH were merged prior to migration to form the composite COSC Seismic Profile, CSP.

| BL (2010)                                           | LD (2011)                                           | S (2014)                                      | S + LD                                              | DH (2014)                                           |
|-----------------------------------------------------|-----------------------------------------------------|-----------------------------------------------|-----------------------------------------------------|-----------------------------------------------------|
| Decoding of Vibrist data                            | Decoding of Vibrist data                            | Stacking of weight-drop gathers               |                                                     | Stacking of weight-drop gathers                     |
| Manual Trace Edits                                  | Manual Trace Edits                                  | Manual Trace Edits                            |                                                     | Manual Trace Edits                                  |
| Floating datum statics                              | Floating datum statics                              | Floating datum statics                        |                                                     | Floating datum statics                              |
| Refraction static corrections                       | Refraction static corrections                       | Refraction static corrections                 | Data merged                                         | Refraction static corrections                       |
| Frontmute                                           | Frontmute                                           |                                               | Surgical mute                                       | Frontmute & Surgical mute                           |
| Spherical divergence compensation                   | Spherical divergence compensation                   | Spherical divergence compensation             | Spherical divergence compensation                   | Spherical divergence compensation                   |
| Trace balancing                                     | Trace balancing                                     | Trace balancing                               | Trace balancing                                     | Trace balancing                                     |
| Wiener deconvolution                                | Wiener deconvolution                                | Spectral Equalization                         | Wiener deconvolution                                | Wiener deconvolution                                |
|                                                     |                                                     | Notch filter (50 ± 2 Hz)                      | Notch filter (50 ± 2 Hz)                            | Notch filter (50 ± 2 Hz)                            |
| Band pass filter                                    | Band pass filter                                    | Band pass filter                              | Band pass filter                                    | Band pass filter                                    |
| 0-1 s 25-50-80-120 Hz                               | 0-0.5 s 25-50-100-150 Hz                            | 0-0.5 s 25-50-100-150 Hz                      | 0-1 s 25-50-100-150 Hz                              | 0-1 s 25-50-100-150 Hz                              |
| 1.25-3 s 20-40-80-120 Hz                            | 0.75-1.25 s 20-40-90-135 Hz                         | 0.75-1.25 s 20-40-90-135 Hz                   | 1.25-1.75s 20-40-90-135 Hz                          | 1.25-1.75s 20-40-90-135 Hz                          |
|                                                     | 1.75-3 s 15-30-80-120 Hz                            | 1.75-3 s 15-30-80-120 Hz                      | 2.25-3 s 15-30-80-120 Hz                            | 2.25-3 s 15-30-80-120 Hz                            |
| Airwave filter                                      | Airwave filter                                      |                                               |                                                     |                                                     |
| Median velocity filter 2200, 3200 m s <sup>-1</sup> | Median velocity filter 2200, 3200 m s <sup>-1</sup> | Median velocity filter 3100 m s <sup>-1</sup> | Median velocity filter 1700, 3100 m s <sup>-1</sup> | Median velocity filter 1700, 3100 m s <sup>-1</sup> |
| AGC (200 ms)                                        | AGC (300 ms)                                        |                                               | AGC (200 ms)                                        | AGC (500 ms)                                        |
| Residual static corrections                         | Residual static corrections                         | Residual static corrections                   | Residual static corrections                         | Residual static corrections                         |
| DMO & NMO correction                                | DMO & NMO correction                                | NMO correction                                | NMO correction                                      | NMO correction                                      |
| CMP stacking                                        | CMP stacking                                        | CMP stacking                                  | CMP stacking                                        | CMP stacking                                        |
| Coherency filtering (FX-Deconvolution)              | Coherency filtering (FX-Deconvolution)              | Coherency filtering (FX-Deconvolution)        | Coherency filtering (FX-Deconvolution)              | Coherency filtering (FX-Deconvolution)              |
| FK-filter                                           | FK-filter                                           | Zeromute                                      | Zeromute                                            | Zeromute                                            |
| Stolt migration                                     |                                                     |                                               | FK-filter                                           |                                                     |
| Time-to-Depth conversion                            |                                                     |                                               | Stolt migration                                     | Stolt migration                                     |
|                                                     |                                                     |                                               | Time-to-Depth conversion                            | Time-to-Depth conversion                            |

1183 **Figure Captions**

1184 Figure 1. (a) [Provenance interpretation of the Tectonostratigraphic Map](#) of the Scandinavian  
1185 Caledonides, [modified from Gee et al. \(1985\)](#). The star marks the location of the COSC-1  
1186 borehole. (b) Schematic cross section ([vertical exaggeration x10](#)) along the NW-SE profile  
1187 in (a), [from Gee et al. \(2010\)](#). [The autochthonous basement \(light grey\) is separated from](#)  
1188 [the Caledonian deformed basement \(dark grey\) by the Scandian sole thrust.](#)

**Borttaget:** map

1189 Figure 2. [Bedrock](#) geological map of western Jämtland, [based on the bedrock geological](#)  
1190 [map of Sweden, © Geological Survey of Sweden \[2014/00601\] and Strömberg et al.,](#)  
1191 [\(1984\)](#), showing the locations of the [CSP and CCT](#) seismic profiles, the COSC-1 borehole  
1192 and the shallow drill holes in the Myrviken area. The location of the geological cross  
1193 section, shown in Fig. 3, is also indicated.

**Borttaget:** ) (modified

**Borttaget:** .,1985

**Borttaget:** Regional bedrock

**Borttaget:** CCT seismic profile, the

**Borttaget:** (Based on the bedrock geological map of Sweden, © Geological Survey of Sweden [2014/00601] and Strömberg et al., 1984).

1194 Figure 3. Geological cross section through the Myrviken area boreholes based on the SGU  
1195 report on alum shales (Gee et al., 1982), shown at a vertical exaggeration of 10:1.

1196 Figure 4. Two [examples of](#) source gathers [before and after processing](#). (a) VIBSIST source  
1197 gather from the Byxtjärn-Liten profile from the south shore of Lake Liten (Fig. 2) with only  
1198 trace balancing applied. (b) The same source gather as in (a) after processing. (c) Weight-  
1199 drop source gather from the Sällsjö profile from the eastern end of Lake Liten with only  
1200 trace balancing applied. (d) The same source gather as in (c) after processing.

**Borttaget:** example

1201 Figure 5. (a) Stacked section from the Liten-Dammån profile acquired in 2011 with the  
1202 VIBSIST source. (b) Stacked section from the Sällsjö profile acquired in 2014 with the  
1203 weight-drop source. (c) Data from the Liten-Dammån and Sällsjö profiles processed  
1204 together and stacked. The plan view maps show the three used CDP stacking lines with the  
1205 thick black line indicating the CDP stacking line corresponding to the section shown in the  
1206 same panel. (a) and (c) follow similar CDP stacking lines, while (b) follows a highly crooked  
1207 CDP stacking line.

1208 Figure 6. (a) Composite stacked section of the CSP. (b) Migrated and depth converted  
1209 version of (a). The CDP stacking line is shown in Fig. 2 with CDP numbers marked on the  
1210 map. East of CDP 2850 the weight-drop source was employed.

1211 Figure 7. (a) Total magnetic field [along the CSP](#). The anomalies at about CDP 1800, 3100  
1212 and 4100 can be interpreted as due to variations in the magnetic basement at depths of  
1213 1.3 km, 1.3 km and 1.0 km, respectively. (b) Migrated and depth converted stack from  
1214 Fig. 6 shown at a vertical exaggeration of 2:1. The black line marks the depth to the highly  
1215 conductive layer from MT data as mapped by Yan et al. (2016). An excellent  
1216 correspondence exists between the base of the uppermost seismically transparent zone

**Borttaget:** anomaly

1227 and the mapped conductor. Therefore, the onset of reflectivity below the transparent zone  
1228 is interpreted to represent the [top of the](#) uppermost alum shale. Magnetic data are courtesy  
1229 of the Geological Survey of Sweden (SGU).

1230 Figure 8. Sections of the CSP (top) and CCT profile (bottom) over approximately the same  
1231 structural location. The three prominent reflective zones between 1 and 3 seconds on the  
1232 western halves of the profiles are interpreted to represent the same structures. The  
1233 transparent zone between 0.5 and 2 seconds on the eastern half of the CSP profile is  
1234 interpreted as due to poor S/N because of the thick sequence of loose sediments at the  
1235 surface along this portion of the profile. Although data quality is variable at the equivalent  
1236 location on the CCT profile, clear reflections are present between 0.5 and 2 seconds. It is  
1237 likely that with better quality data, clear reflections would also be observed on the eastern  
1238 half of the CSP between 0.5 and 2 seconds.

1239 Figure 9. [Interpretations](#) of the CSP data. In (a) the [focus is on the sole thrust. The](#)  
1240 interpretation west of CDP 2800 is the same as in Hedin et al. (2012) and [shows](#) significant  
1241 basement involved thrusting; [farther east, the sole thrust is shown to ramp up to join the](#)  
1242 [Jämtlandian décollement near the thrust front](#). In (b) the [Jämtlandian](#) décollement is [shown](#)  
1243 [to dip very gently westwards, lying](#) only a few hundreds of meters below the top of the alum  
1244 shales, as interpreted from the CSP and the MT data. A second level of detachment [may](#)  
1245 exist in the shallow basement reflectors below CDP 1000 to 3200. Numbers (1), (2) and (3)  
1246 are referenced in the text.

1247 Figure 10. (a) Option 1 for the COSC-2 borehole. Here, the [Jämtlandian](#) décollement would  
1248 be penetrated at about 1.3-1.5 km depth, if the interpretation in Fig. 9b is correct.  
1249 Logistically, it is easier to place the borehole about 1 km to the east. Even at this location,  
1250 two or three Precambrian reflectors would be penetrated. (b) In option 2 for the COSC-2  
1251 borehole, the [Jämtlandian](#) décollement would be drilled at about 500 m depth. The [structure](#)  
1252 [beneath the Jämtlandian décollement, down to about 1600m](#), is [dominated by a duplex,](#)  
1253 [probably consisting of sedimentary formations and basement-derived imbricates. The basal](#)  
1254 [thrust of the duplex is inferred to coincide with the Caledonian sole thrust. The conductivity](#)  
1255 profiles shown in the figures are placed at the locations of the MT stations that the  
1256 inversions were performed for. In (a) the uppermost alum shale would be penetrated at  
1257 about 900 m depth and in (b) it would be penetrated at about 400 m depth.

**Borttaget:** Two possible interpretations

**Borttaget:** with a deep main décollement

**Borttaget:** main

**Borttaget:** main

**Borttaget:** much shallower in the west and lies

**Borttaget:** might

**Borttaget:** and

**Borttaget:** corresponding to a location where the two interpretations in Fig. 9 differ significantly.

**Borttaget:** main

**Borttaget:** main

**Borttaget:** 1700

**Borttaget:** as interpreted in Fig. 9a.

**Borttaget:** main

**Borttaget:** rock between 800 m and 1.7 km

**Borttaget:** interpreted to consist of

**Borttaget:** structures. Conductivity

# Figure 1

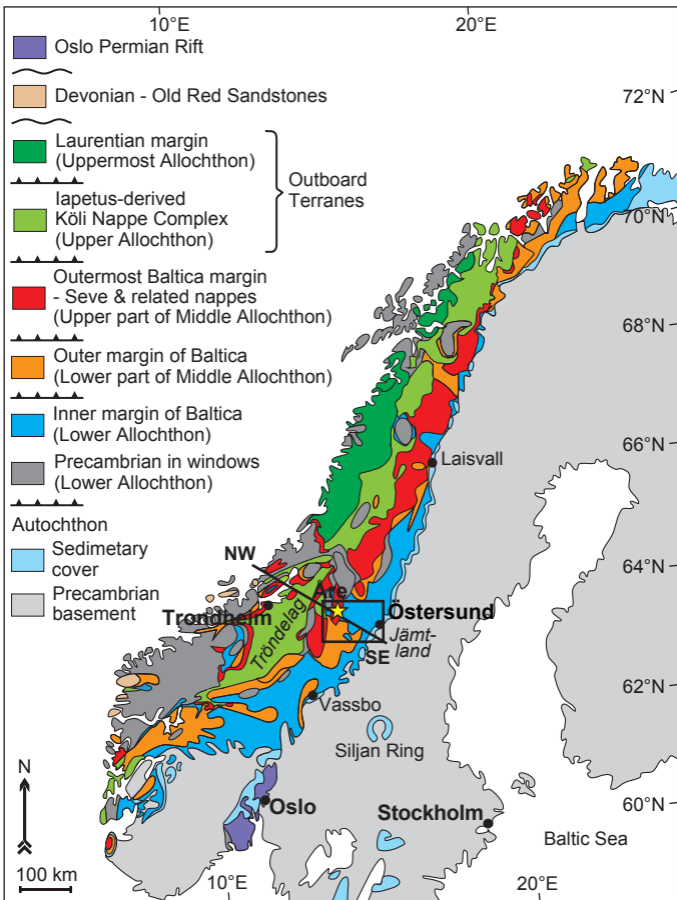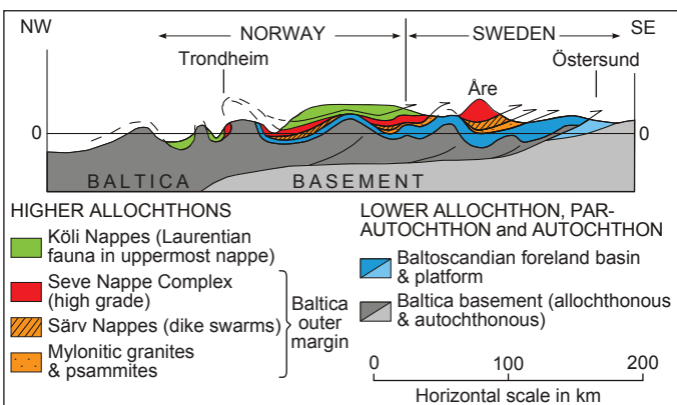

Figure 2

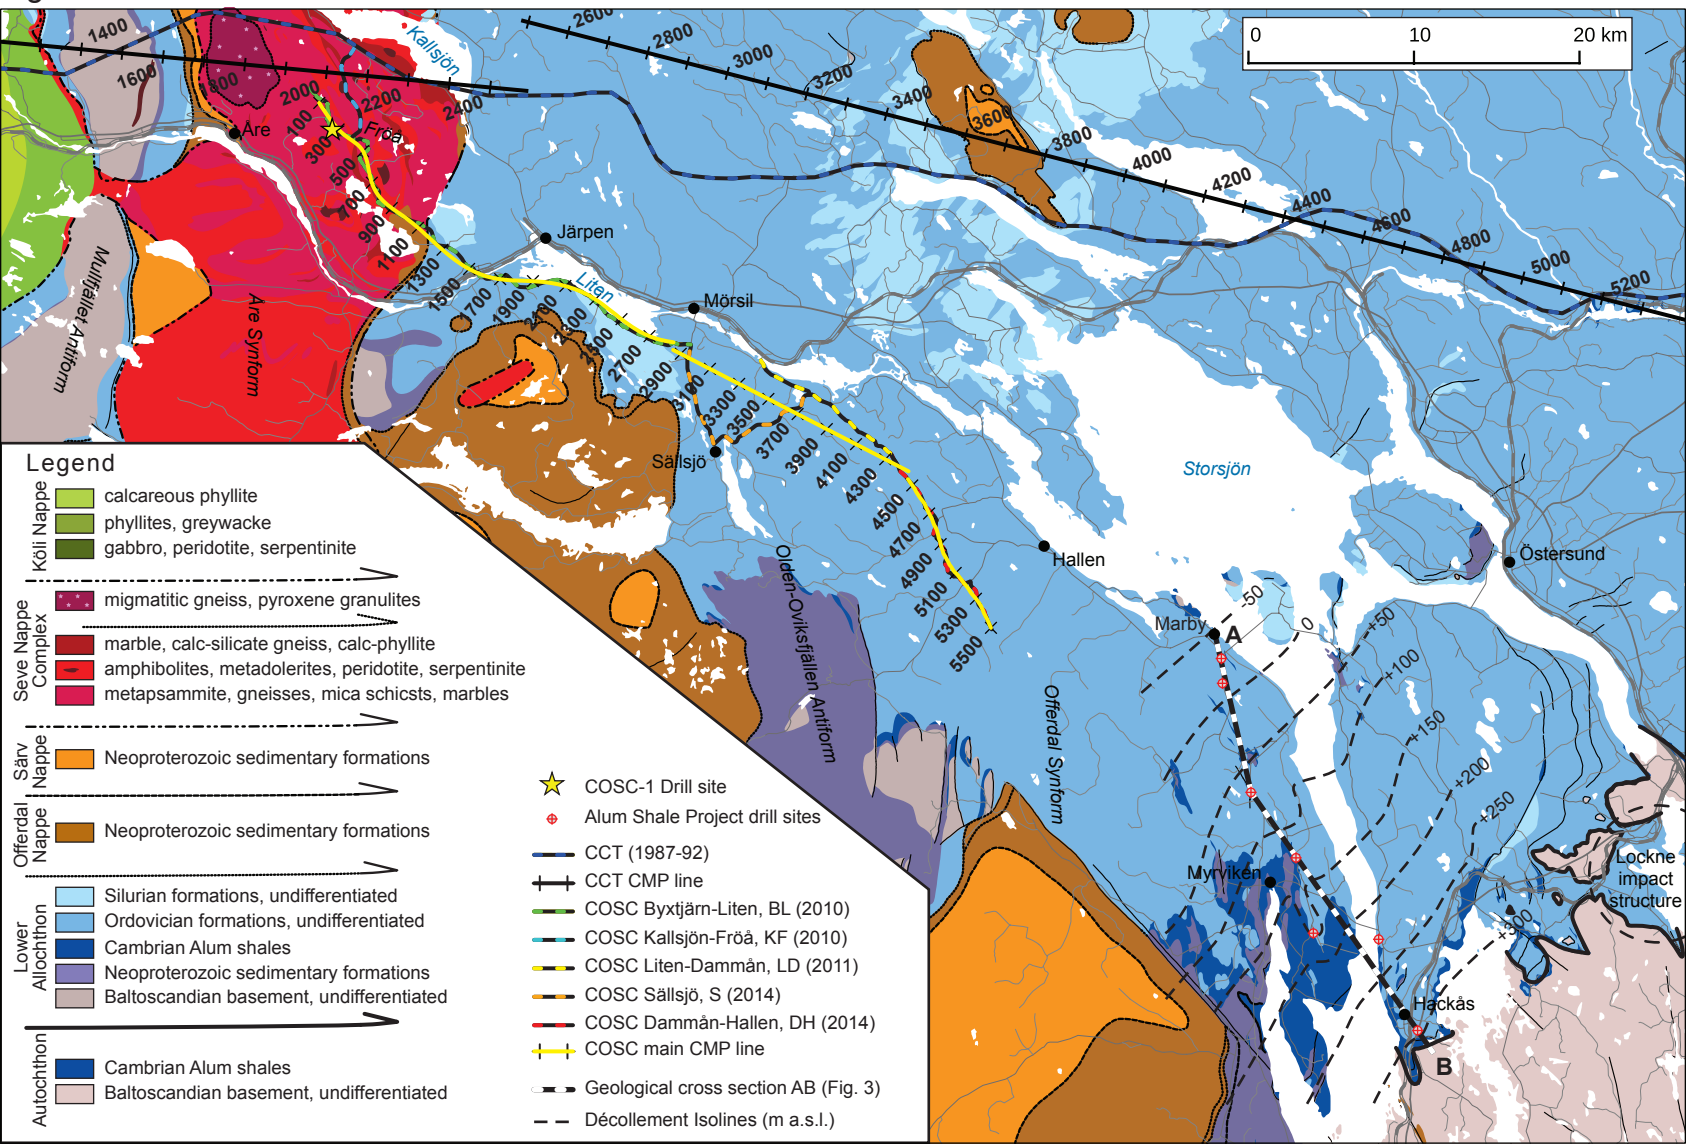

Figure 3

### Profile Marby-Oviken-Hackås

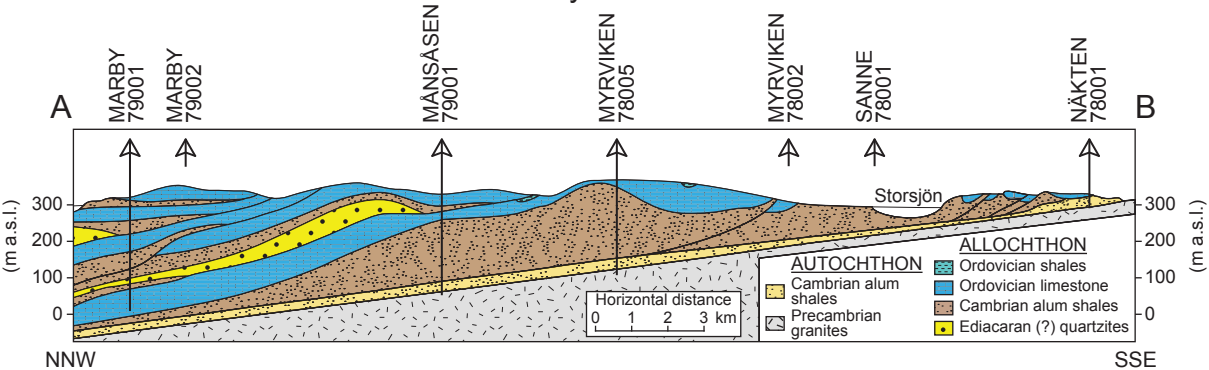



Figure 4

Byxtjärn-Liten profile source point 1596 (VIBSIST, 2010)

Trace balancing

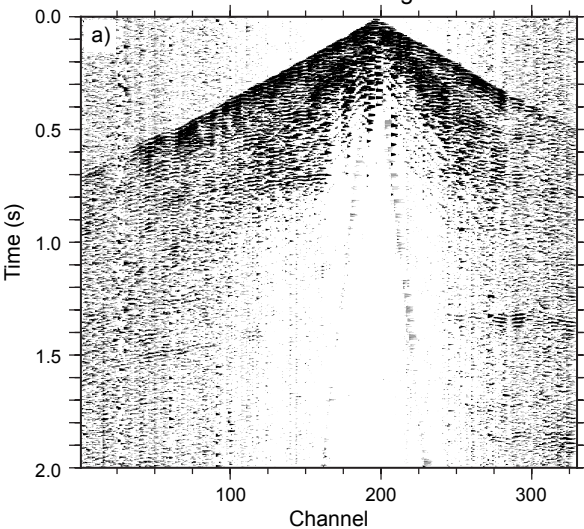

Pre-stack processing

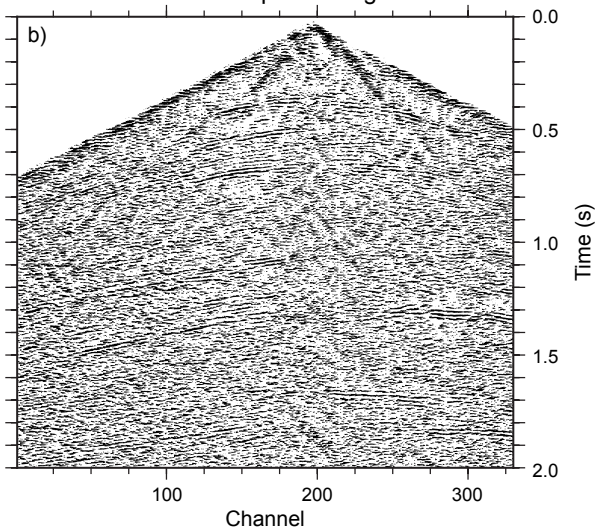

Sällsjö profile source point 9 (weight drop, 2014)

Trace balancing

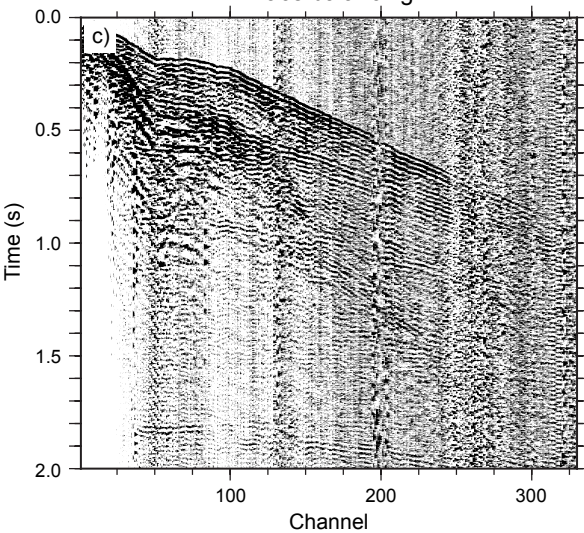

Pre-stack processing

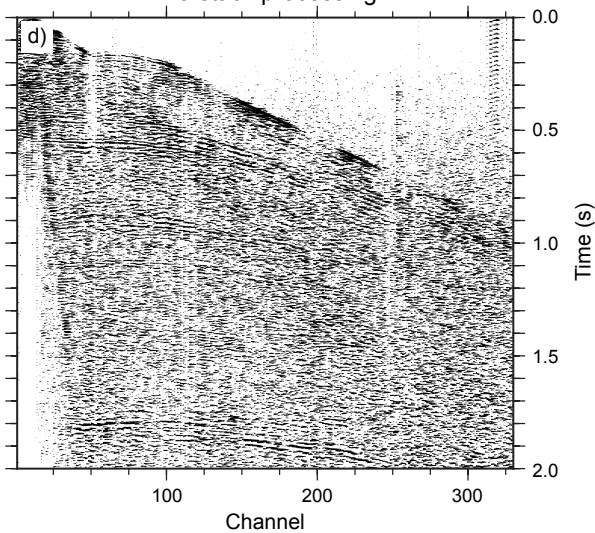

Figure 5

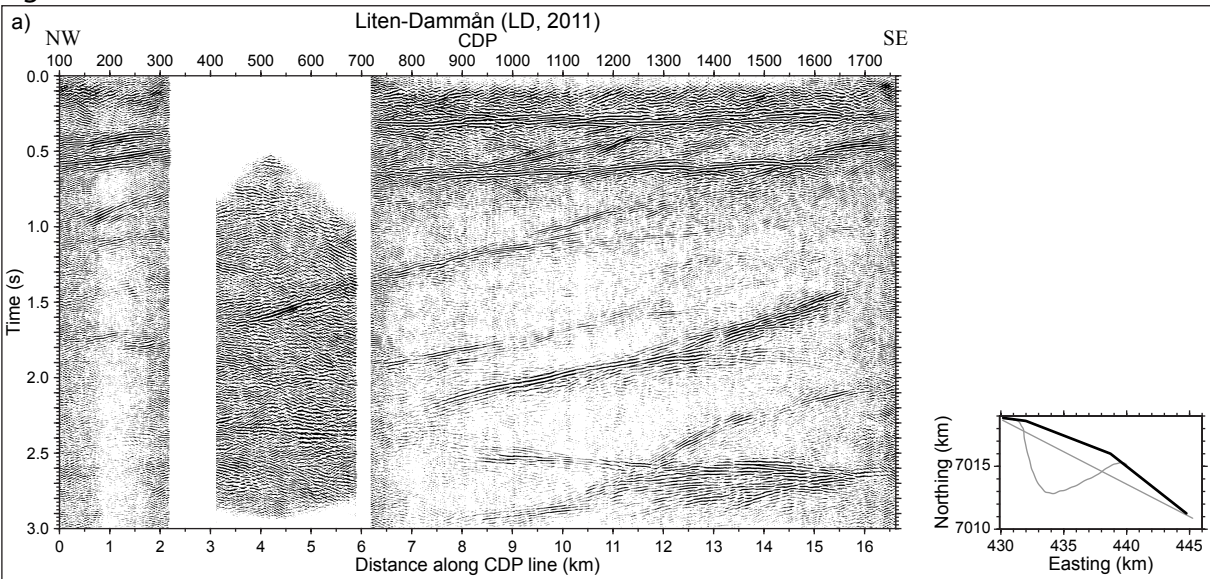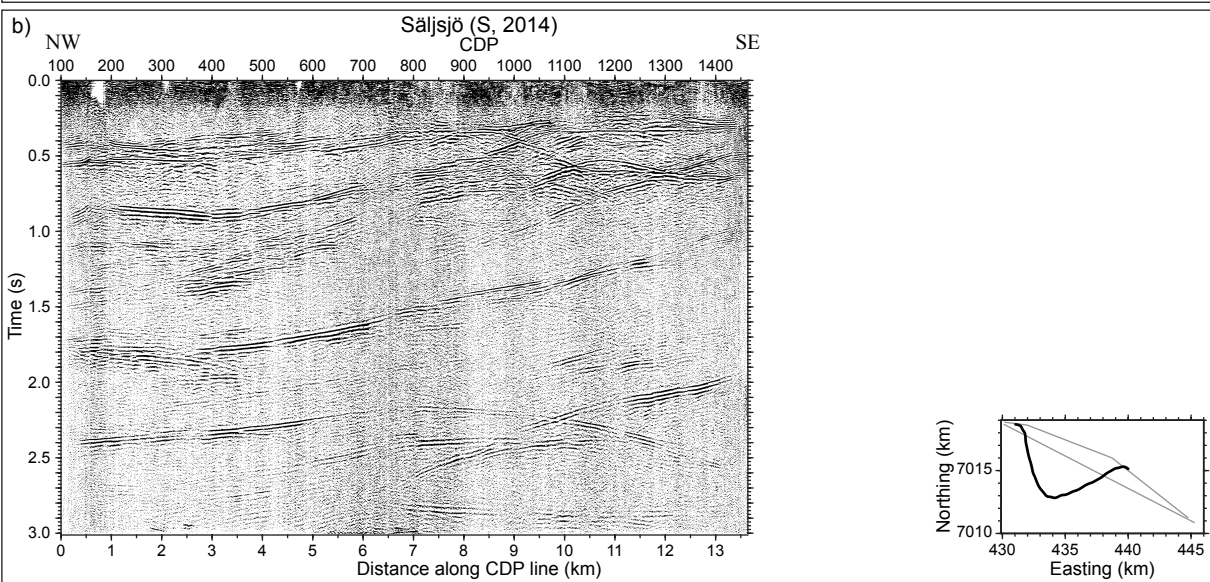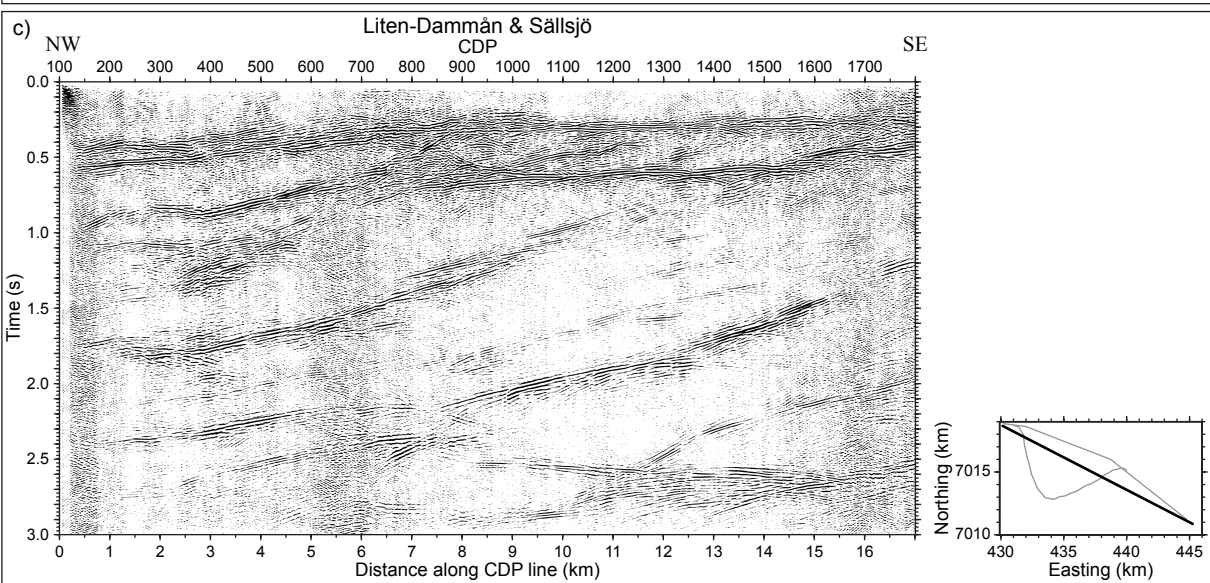

Figure 6

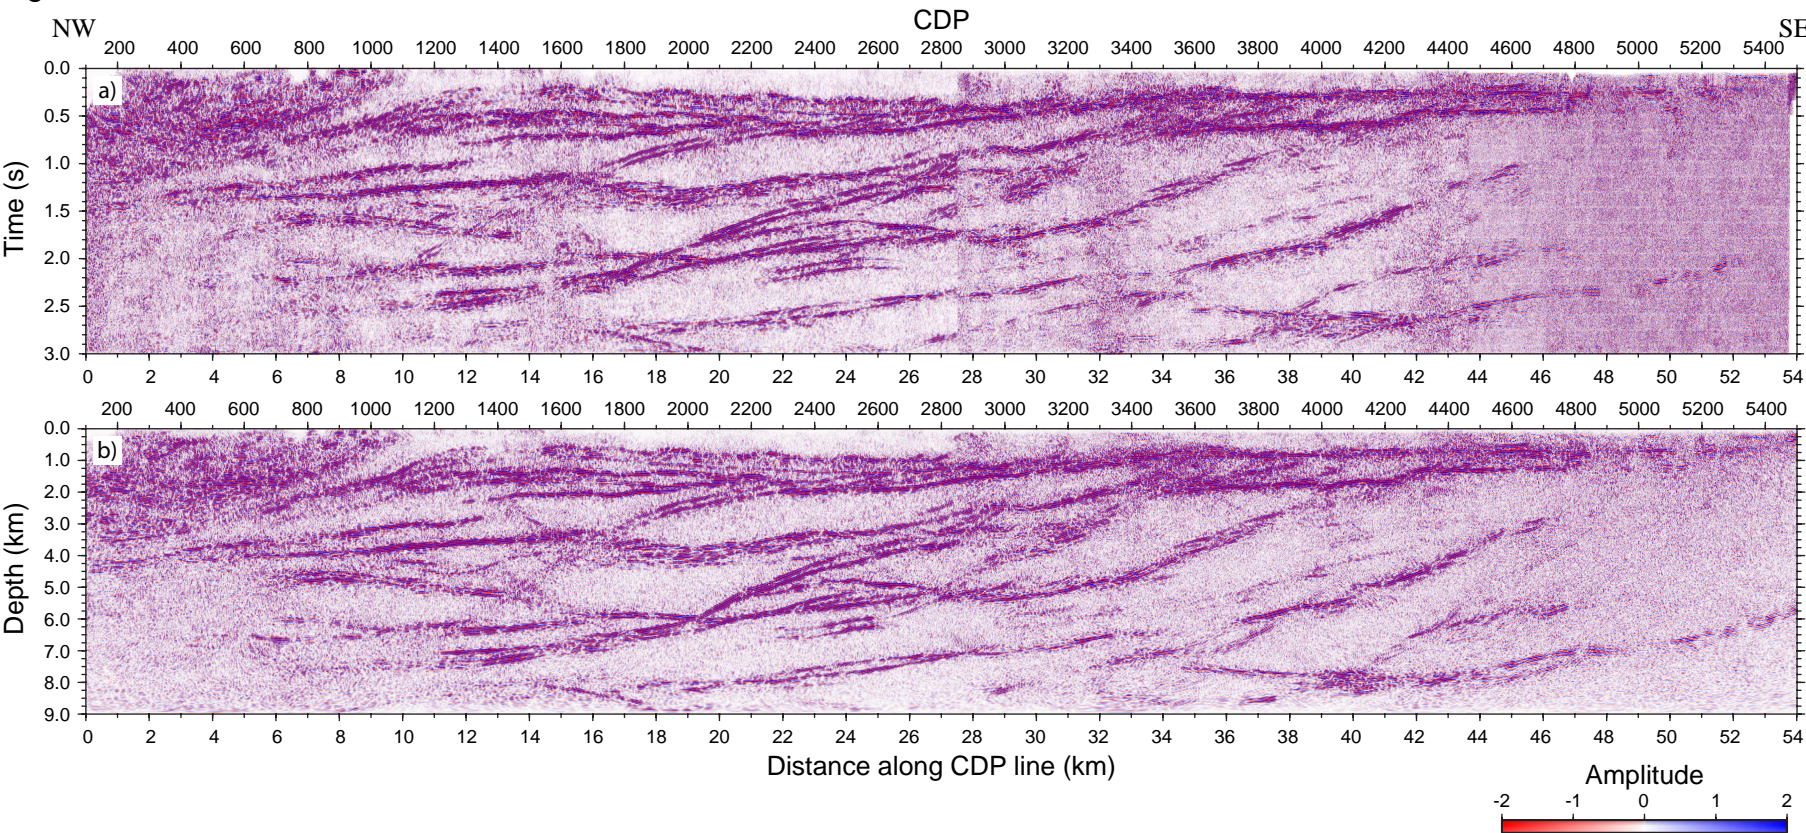

**Figure 7**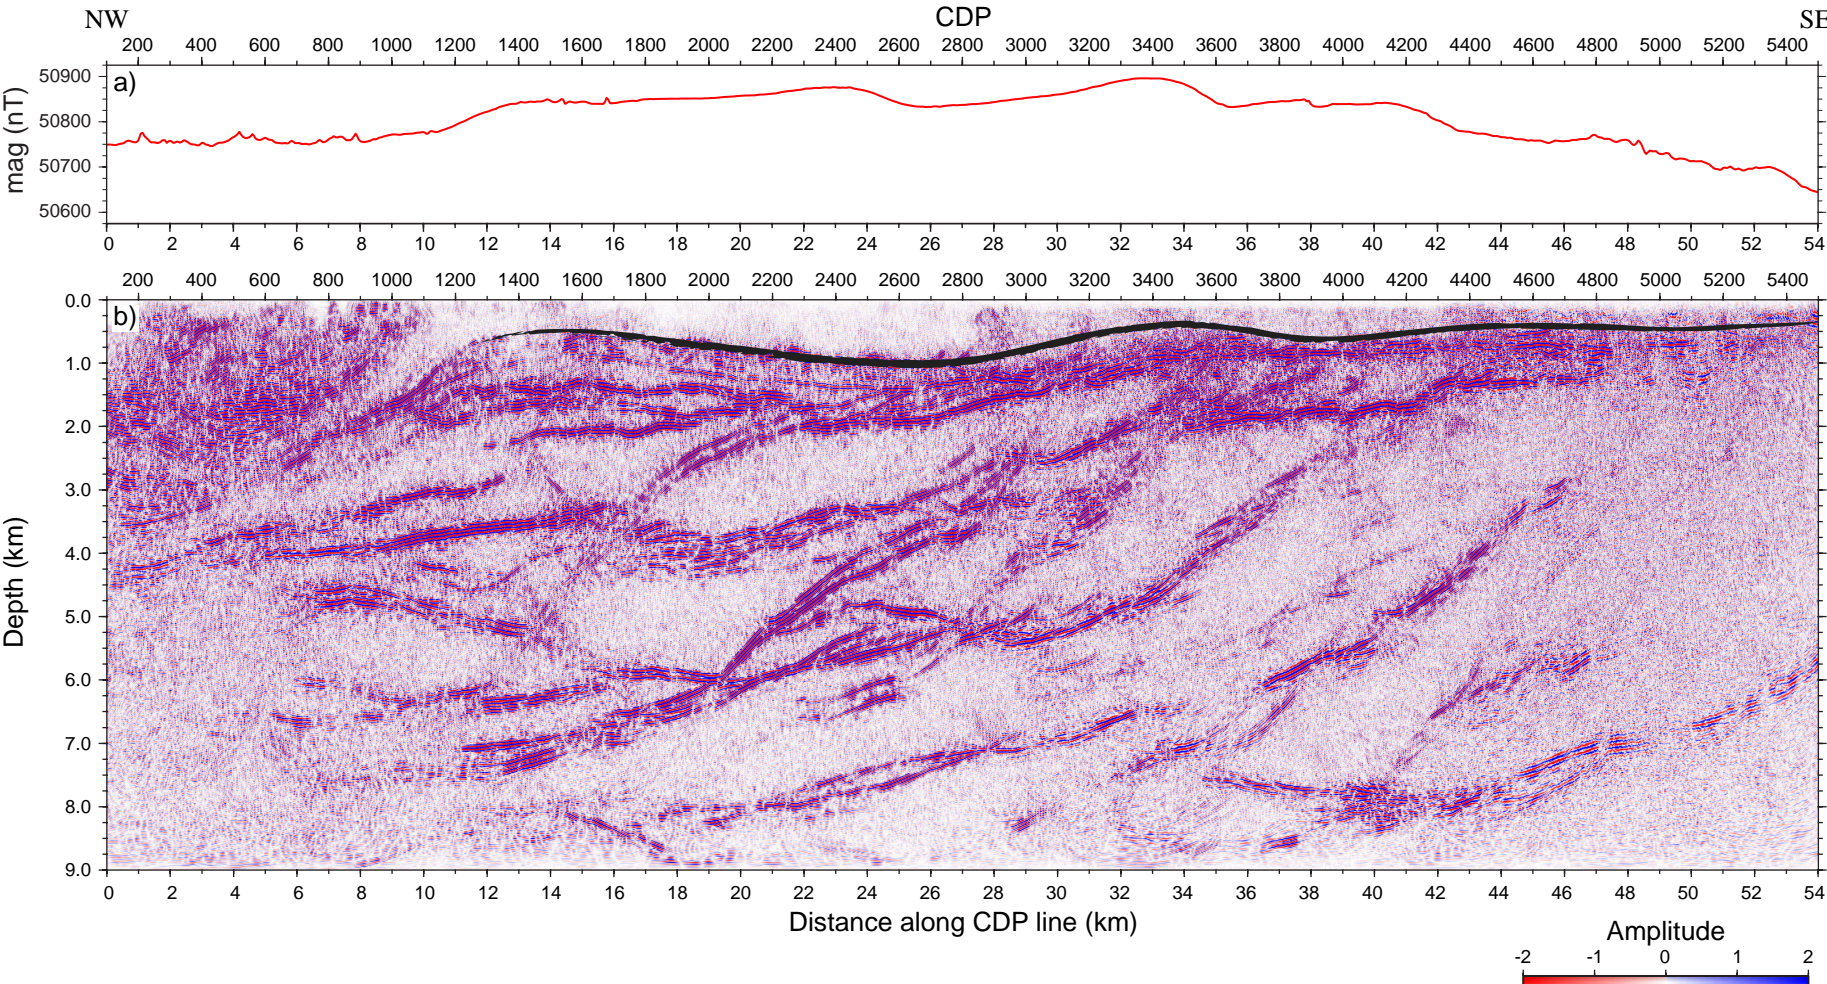

Figure 8

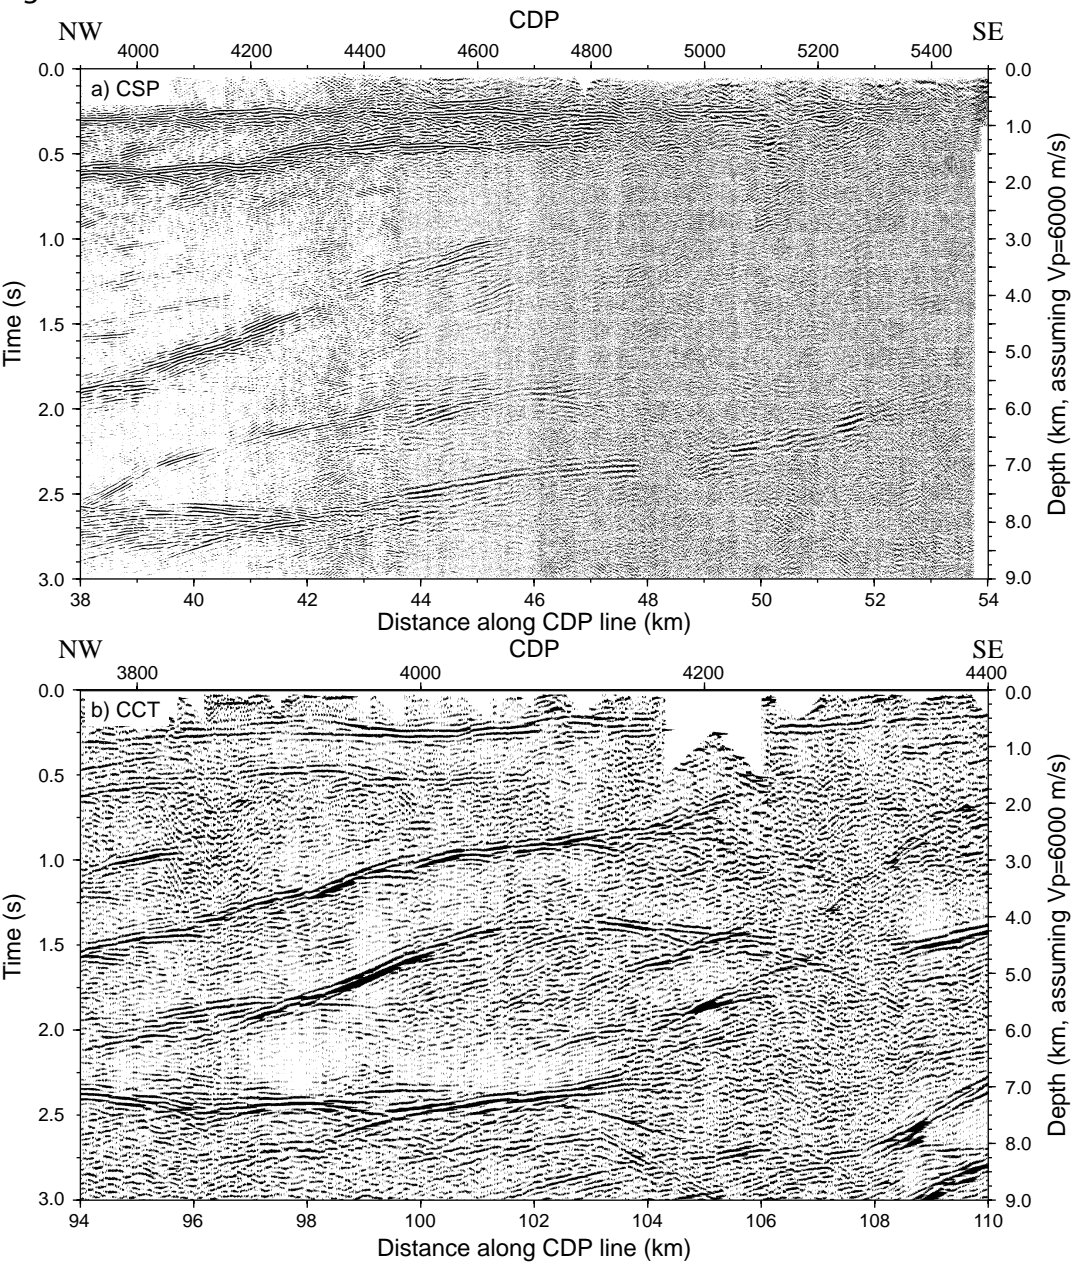

Figure 9

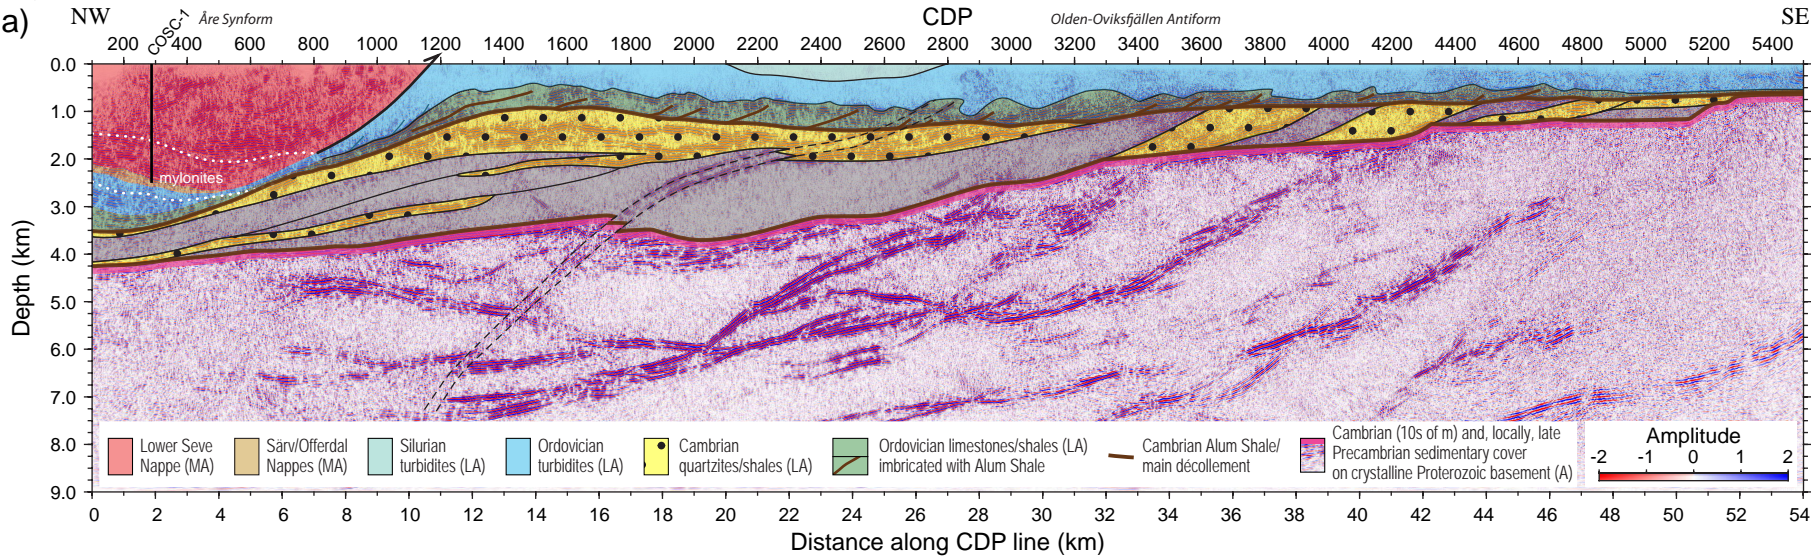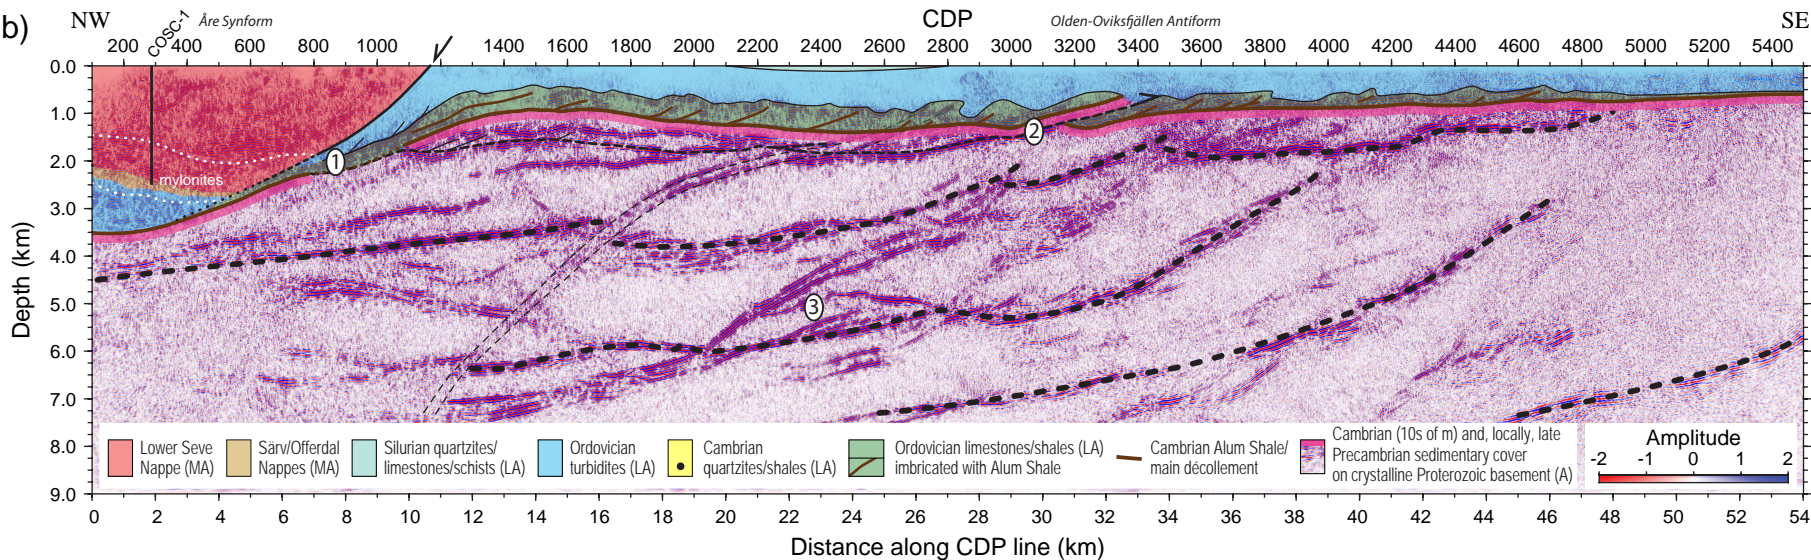

Figure 10

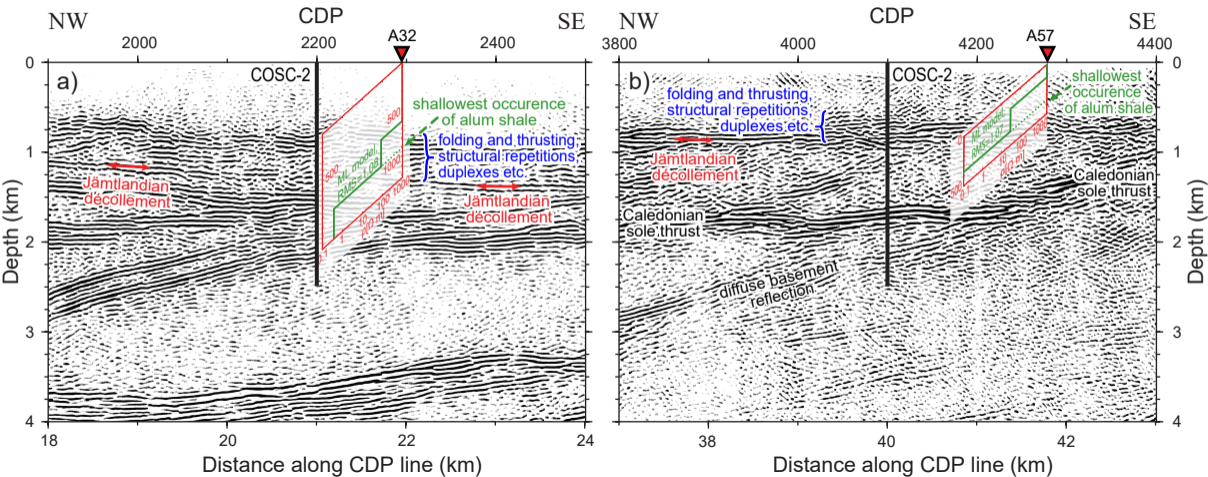

Supplement: Supplementary file [file se-2015-129-AC1-supplement.pdf]
